# Supplementary material for: Eight-coordinate mono- and dinuclear Dy(iii) complexes containing a rigid equatorial plane and an anisobidentate carboxylate ligand in the axial position: synthesis, structure and magnetism
Source: Royal Society of Chemistry journal article supplement (doi:10.1039/d4dt00803k), 2024-01-01
Supplement: d4dt00803k1.pdf [file d4dt00803k1.pdf]

*Electronic Supporting Information*

**Eight-Coordinate Mono- and Dinuclear Dy(III) Complexes Containing a Rigid equatorial plane and an Anisobidentate Carboxylate ligand in the Axial position: Synthesis, Structure and Magnetism.**

Pankaj Kalita\*,<sup>a</sup> Kusum Kumari,<sup>b</sup> Pawan Kumar,<sup>c</sup> Vierandra Kumar,<sup>c</sup> Saurabh Kumar Singh,<sup>\*b</sup> Guillaume Rogez\*<sup>d</sup> and Vadapalli Chandrasekhar\*<sup>c</sup>

<sup>a</sup>Department of Chemistry, Nowgong Girls' College, Nagaon, Assam-782 002, India.

<sup>b</sup>Department of Chemistry, Indian Institute of Technology Hyderabad, Kandi, Sangareddy, Telangana-502 285, India.

<sup>c</sup>Tata Institute of Fundamental Research Hyderabad, Gopanally, Hyderabad-500 107, India.

<sup>d</sup>Institut de Physique et Chimie des Matériaux de Strasbourg (IPCMS) CNRS/Université de Strasbourg, UMR 7504, 67000 Strasbourg, France.

\*vc@tifr.res.in; Guillaume.Rogez@ipcms.unistra.fr; sksingh@chy.iith.ac.in;

pankajkalita976@gmail.com

---

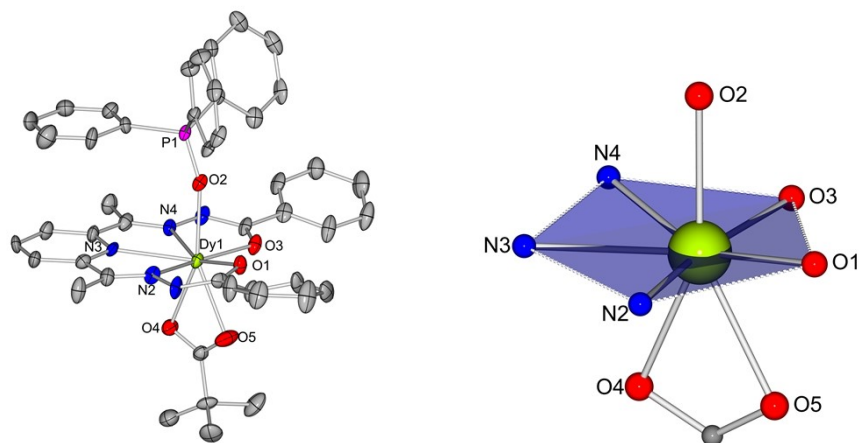

**Figure S1.** Molecular structure of complex **2**. Thermal ellipsoids at 30% probability level are shown (*left*) and the hula-hoop like coordination geometry (*right*). (The H atoms, disordered atoms and masked solvent molecules are removed for clarity)

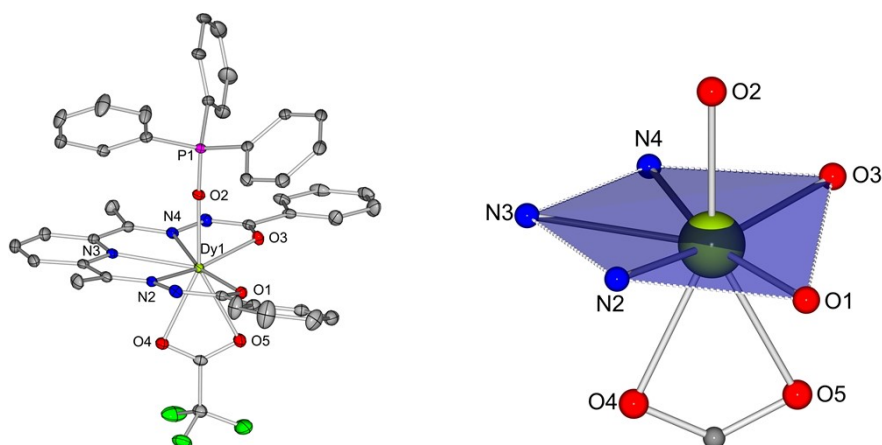

**Figure S2.** Molecular structure of complex **3**. Thermal ellipsoids at 30% probability level are shown (*left*) and the hula-hoop like coordination geometry (*right*). (The H atoms are removed for clarity)

**Table S1.** The average *enolate* and *imino* bond lengths of [L]<sup>2-</sup> and Dy–O<sub>phos</sub> distances

| Complex                                   | C=N (Å) | C–O (Å) | Dy–O <sub>phos</sub> (Å) | Ref.      |
|-------------------------------------------|---------|---------|--------------------------|-----------|
| (L')DyCl <sub>2</sub>                     | 1.338   | 1.275   | –                        | [1]       |
| [(L)Dy(Cy <sub>3</sub> PO)Cl]             | 1.322   | 1.289   | 2.237                    | [2]       |
| [(L)Dy(Ph <sub>3</sub> PO)Cl]             | 1.327   | 1.287   | 2.276                    | [2]       |
| [(L)Dy(Cy <sub>3</sub> PO) <sub>2</sub> ] | 1.325   | 1.283   | 2.231                    | [3]       |
| Complex 1                                 | 1.323   | 1.281   | 2.280                    | This work |
| Complex 2                                 | 1.338   | 1.287   | 2.307                    |           |
| Complex 3                                 | 1.325   | 1.284   | 2.281                    |           |
| Complex 4                                 | 1.325   | 1.285   | 2.308                    |           |

(Typical bond lengths of C=N: 1.29 Å; Csp<sup>2</sup>–Nsp<sup>3</sup>: 1.43 Å; C=O: 1.21 Å; Csp<sup>2</sup>–O: 1.35 Å)

**Table S2.** Analysis of Dy(III) coordination geometry using SHAPE.

| Complex   | Structure <sup>†</sup> |        |        |        |        |              |        |          |         |              |       |        |         |
|-----------|------------------------|--------|--------|--------|--------|--------------|--------|----------|---------|--------------|-------|--------|---------|
|           | OP-8                   | HPY-8  | HBPY-8 | CU-8   | SAPR-8 | TDD-8        | JGBF-8 | JETBPY-8 | JBTPR-8 | BTPR-8       | JSD-8 | TT-8   | ETBPY-8 |
| Complex 1 | 32.509                 | 22.252 | 10.799 | 9.832  | 6.149  | <b>4.789</b> | 9.435  | 23.747   | 5.298   | <b>4.594</b> | 6.082 | 10.654 | 20.796  |
| Complex 2 | 32.731                 | 22.412 | 12.814 | 11.370 | 5.561  | <b>3.752</b> | 10.104 | 23.106   | 5.025   | <b>4.352</b> | 5.050 | 12.133 | 20.028  |
| Complex 3 | 33.868                 | 23.446 | 11.026 | 9.956  | 5.244  | <b>4.611</b> | 8.806  | 25.957   | 5.138   | <b>4.424</b> | 5.857 | 10.744 | 22.730  |
| Complex 4 | 32.063                 | 21.771 | 14.585 | 13.305 | 5.987  | <b>3.958</b> | 11.021 | 22.905   | 4.371   | <b>3.627</b> | 5.250 | 13.971 | 19.359  |

<sup>†</sup>OP-8: Octagon (*D*<sub>8h</sub>); HPY-8: Heptagonal pyramid (*C*<sub>7v</sub>); HBPY-8: Hexagonal bipyramid (*D*<sub>6h</sub>); CU-8 Cube (*O*<sub>h</sub>); SAPR-8: Square antiprism (*D*<sub>4d</sub>); TDD-8: Triangular dodecahedron (*D*<sub>2d</sub>); JGBF-8: Johnson gyrobifastigium J26 (*D*<sub>2d</sub>); JETBPY-8: Johnson elongated triangular bipyramid J14 (*D*<sub>3h</sub>); JBTPR-8: Biaugmented trigonal prism J50 (*C*<sub>2v</sub>); BTPR-8: Biaugmented trigonal prism (*C*<sub>2v</sub>); JSD-8 Snub diphenoid J84 (*D*<sub>2d</sub>); TT-8: Triakis tetrahedron (*T*<sub>d</sub>) ETBPY-8: Elongated trigonal bipyramid (*D*<sub>3h</sub>)

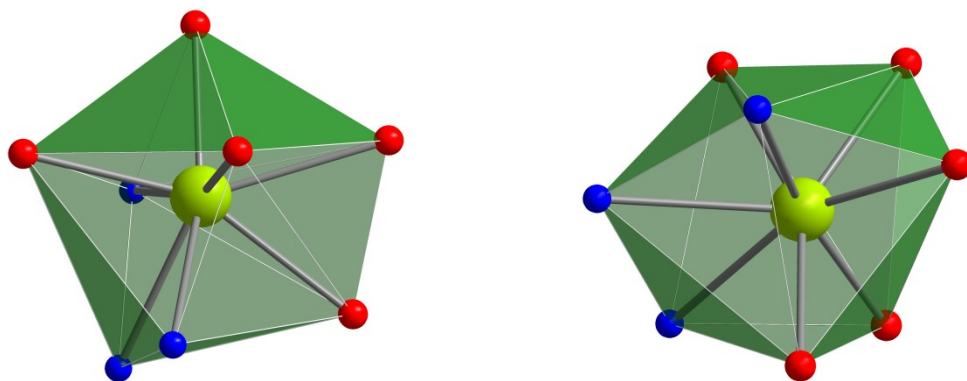

**Figure S3.** The triangular dodecahedron (TDD-8; *left*) and the biaugmented trigonal prism (BTTPR-8; *right*) coordination geometries of the Dy(III) in complex **1**.

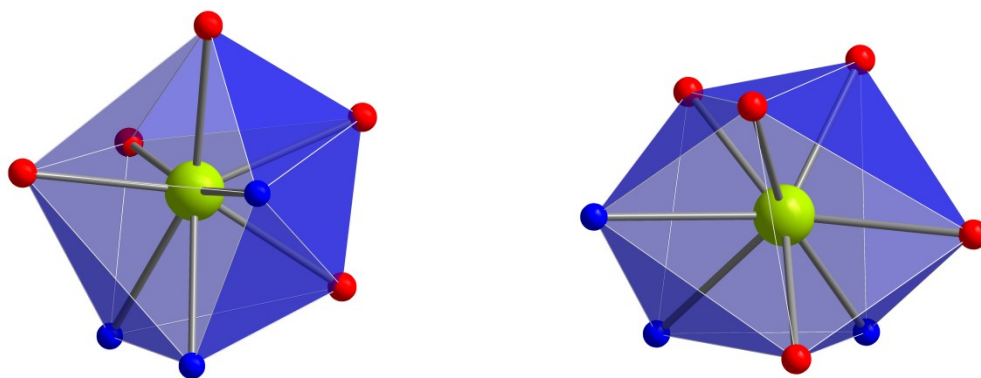

**Figure S4.** The triangular dodecahedron (TDD-8; *left*) and the biaugmented trigonal prism (BTTPR-8; *right*) coordination geometries of the Dy(III) in complex **2**.

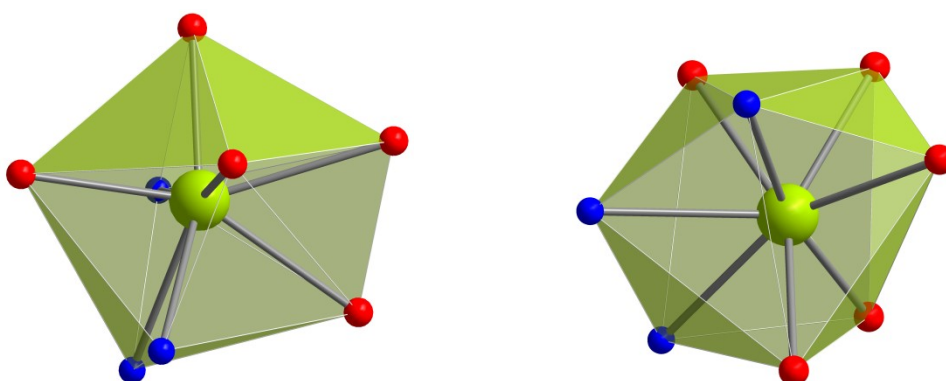

**Figure S5.** The triangular dodecahedron (TDD-8; *left*) and the biaugmented trigonal prism (BTTPR-8; *right*) coordination geometries of the Dy(III) in complex **3**.

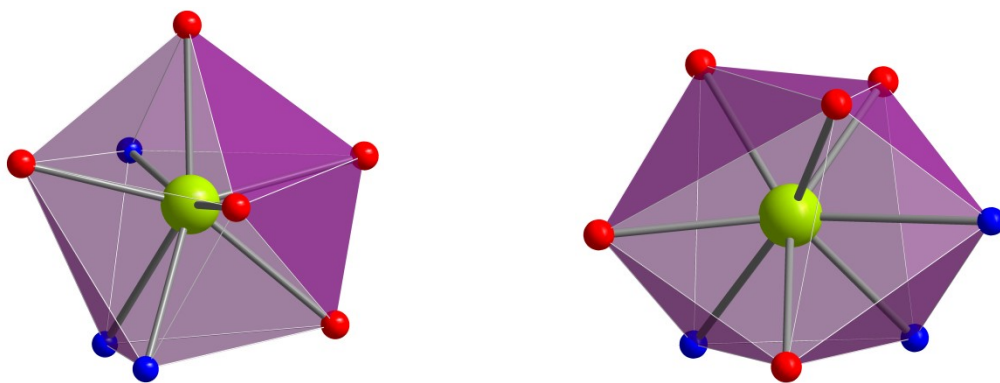

**Figure S6.** The triangular dodecahedron (TDD-8; *left*) and the biaugmented trigonal prism (BTTPR-8; *right*) coordination geometries of the Dy(III) in complex 4.

**Table S3.** Crystallographic details of complexes 2–4.

| Bond distances (Å) |          | Bond angles (°) |          |           |           |
|--------------------|----------|-----------------|----------|-----------|-----------|
| <b>Complex 2</b>   |          | O1–Dy1–O4       | 124.7(4) | O1–Dy1–O5 | 73.2(4)   |
|                    |          | O1–Dy1–N2       | 64.0(3)  | O1–Dy1–N3 | 126.3(4)  |
|                    |          | O1–Dy1–N4       | 157.3(4) | O2–Dy1–O1 | 80.3(3)   |
| Dy1–O1             | 2.329(9) | O2–Dy1–O4       | 154.5(3) | O2–Dy1–O5 | 151.6(4)  |
| Dy1–O2             | 2.307(8) | O2–Dy1–N2       | 89.1(3)  | O2–Dy1–N3 | 85.5(3)   |
| Dy1–O3             | 2.287(9) | O2–Dy1–N4       | 80.8(3)  | O3–Dy1–O1 | 101.1(3)  |
| Dy1–O4             | 2.419(9) | O3–Dy1–O2       | 86.4(3)  | O3–Dy1–O4 | 92.7(3)   |
| Dy1–O5             | 2.390(1) | O3–Dy1–O5       | 88.7(4)  | O3–Dy1–N2 | 165.0(3)  |
| Dy1–N2             | 2.448(8) | O3–Dy1–N3       | 129.5(4) | O3–Dy1–N4 | 65.2(3)   |
| Dy1–N3             | 2.463(1) | O4–Dy1–N2       | 97.4(4)  | O4–Dy1–N3 | 75.4(3)   |
| Dy1–N4             | 2.464(9) | O4–Dy1–N4       | 75.7(3)  | O5–Dy1–O4 | 53.6(4)   |
|                    |          | O5–Dy1–N2       | 88.5(4)  | O5–Dy1–N3 | 118.5(5)  |
|                    |          | O5–Dy1–N4       | 121.9(3) | N2–Dy1–N3 | 64.2(4)   |
|                    |          | N2–Dy1–N4       | 128.1(3) | N3–Dy1–N4 | 64.4(3)   |
| <b>Complex 3</b>   |          | O1–Dy1–O2       | 86.91(8) | O1–Dy1–O3 | 101.38(7) |

|                         |          |           |            |           |            |
|-------------------------|----------|-----------|------------|-----------|------------|
|                         |          | O1-Dy1-O4 | 99.61(8)   | O1-Dy1-O5 | 78.29(8)   |
|                         |          | O1-Dy1-N2 | 65.08(8)   | O1-Dy1-N3 | 129.12(8)  |
| Dy1-O1                  | 2.276(2) | O1-Dy1-N4 | 165.82(8)  | O2-Dy1-O3 | 85.04(8)   |
| Dy1-O2                  | 2.281(2) | O2-Dy1-O4 | 153.65(7)  | O2-Dy1-O5 | 153.01(7)  |
| Dy1-O3                  | 2.300(2) | O2-Dy1-N2 | 77.93(8)   | O2-Dy1-N3 | 83.22(7)   |
| Dy1-O4                  | 2.461(2) | O2-Dy1-N4 | 89.80(8)   | O3-Dy1-O4 | 118.07(7)  |
| Dy1-O5                  | 2.512(2) | O3-Dy1-O5 | 76.06(8)   | O3-Dy1-N2 | 158.55(8)  |
| Dy1-N2                  | 2.467(2) | O3-Dy1-N3 | 127.06(8)  | O3-Dy1-N4 | 64.56(8)   |
| Dy1-N3                  | 2.491(2) | O4-Dy1-O5 | 52.63(7)   | O4-Dy1-N2 | 81.76(8)   |
| Dy1-N4                  | 2.457(3) | O4-Dy1-N3 | 72.82(7)   | N2-Dy1-O5 | 114.75(8)  |
|                         |          | N2-Dy1-N3 | 64.04(8)   | N3-Dy1-O5 | 123.58(7)  |
|                         |          | N4-Dy1-O4 | 89.41(8)   | N4-Dy1-O5 | 99.03(8)   |
|                         |          | N4-Dy1-N2 | 127.57(8)  | N4-Dy1-N3 | 63.97(8)   |
| <b><u>Complex 4</u></b> |          | O1-Dy1-O2 | 100.30(10) | O1-Dy1-O3 | 87.47(11)  |
|                         |          | O1-Dy1-O4 | 90.12(11)  | O1-Dy1-O5 | 94.56(11)  |
|                         |          | O1-Dy1-N2 | 65.20(10)  | O1-Dy1-N3 | 129.08(10) |
| Dy1-O1                  | 2.288(3) | O1-Dy1-N4 | 164.27(10) | O2-Dy1-O3 | 79.16(10)  |
| Dy1-O2                  | 2.307(3) | O2-Dy1-O4 | 126.48(10) | O2-Dy1-O5 | 73.25(10)  |
| Dy1-O3                  | 2.308(3) | O2-Dy1-N2 | 155.50(11) | O2-Dy1-N3 | 127.28(10) |
| Dy1-O4                  | 2.442(3) | O2-Dy1-N4 | 64.69(10)  | O3-Dy1-O4 | 154.20(10) |
| Dy1-O5                  | 2.417(3) | O3-Dy1-O5 | 152.26(11) | O3-Dy1-N2 | 80.50(11)  |
| Dy1-N2                  | 2.466(3) | O3-Dy1-N3 | 85.17(11)  | O3-Dy1-N4 | 85.07(11)  |
| Dy1-N3                  | 2.487(3) | O4-Dy1-N2 | 75.20(10)  | O4-Dy1-N3 | 76.51(11)  |
| Dy1-N4                  | 2.469(3) | O4-Dy1-N4 | 102.55(11) | O5-Dy1-O4 | 53.55(10)  |
|                         |          | O5-Dy1-N2 | 125.33(10) | O5-Dy1-N3 | 113.90(11) |
|                         |          | O5-Dy1-N4 | 85.78(12)  | N2-Dy1-N3 | 63.88(11)  |
|                         |          | N2-Dy1-N4 | 126.77(11) | N4-Dy1-N3 | 64.02(11)  |

**Table S4.** Analysis of short ring-interactions with Cg-Cg distances < 5.0 Å, Alpha < 20.00°and Beta < 60.00° for **1**.

[ARU(J)] = Symmetry operation on Cg(J)

Alpha = Dihedral Angle between Planes I and J (Deg)

Beta = Angle Cg(I) &gt; Cg(J) or Cg(I) &gt; Me vector and normal to plane I (Deg)

Gamma = Angle Cg(I) &gt; Cg(J) vector and normal to plane J (Deg)

Cg-Cg = Distance between ring Centroids (Ang.)

CgI\_Perp = Perpendicular distance of Cg(I) on ring J (Ang.)

CgJ\_Perp = Perpendicular distance of Cg(J) on ring I (Ang.)

Slippage = Distance between Cg(I) and Perpendicular Projection of Cg(J) on Ring I (Ang.).

| Cg(I) | Cg(J) | [ARU(J)]            | Cg-Cg      | Alpha     | Beta | Gamma | CgI_Perp   | CgJ_Perp   | Slippage |
|-------|-------|---------------------|------------|-----------|------|-------|------------|------------|----------|
| Cg1   | Cg7   | X,Y,Z               | 3.8201(15) | 9.51(13)  | 17.7 | 27.2  | 3.3983(11) | 3.6399(11) | 1.160    |
| Cg1   | Cg8   | -1/2+X,1/2-Y,-1/2+Z | 4.6757(15) | 15.51(12) | 40.2 | 55.1  | 2.6759(11) | 3.5728(11) | 3.016    |
| Cg5   | Cg5   | 1-X,1-Y,-Z          | 4.9925(16) | 0.02(13)  | 50.8 | 50.8  | 3.1522(11) | 3.1523(11) | 3.871    |

Cg1: (N3, C3, C4, C5, C6, C7); Cg5: (C25, C26, C27, C28, C29, C30); Cg7: (C37, C38, C39, C40, C41, C42);

Cg8: (C43, C44, C45, C46, C47, C48)

**Table S5.** Analysis of X-H...Cg (Pi-ring) interactions (H...Cg < 3.0 Å, Gamma < 40.0°) for **1**.

Cg(J) = Center of gravity of ring J (Plane number above)

[ARU(J)] = Symmetry operation on Cg(J)

H-Perp = Perpendicular distance of H to ring plane J

Gamma = Angle between Cg-H vector and ring J normal

X-H...Cg = X-H-Cg angle (degrees)

X...Cg = Distance of X to Cg (Angstrom)

X-H, Pi = Angle of the X-H bond with the Pi-plane (i.e.' Perpendicular = 90 degrees, Parallel = 0 degrees)

| X-H(I)  | Cg(J) | [ARU(J)]            | H...Cg | H-Perp | Gamma | X-H..Cg | X..Cg    | X-H, Pi |
|---------|-------|---------------------|--------|--------|-------|---------|----------|---------|
| C28-H28 | Cg8   | 3/2-X,1/2+Y,1/2-Z   | 2.63   | -2.59  | 9.95  | 148     | 3.473(3) | 67      |
| C15-H15 | Cg6   | 1+X, Y, Z           | 2.91   | -2.91  | 3.04  | 148     | 3.755(3) | 61      |
| C26-H26 | Cg2   | -1/2+X,1/2-Y,-1/2+Z | 2.98   | -2.82  | 18.87 | 150     | 3.835(3) | 54      |
| C35-H35 | Cg5   | -1/2+X,1/2-Y,1/2+Z  | 3.00   | 2.71   | 25.26 | 139     | 3.768(3) | 44      |

Cg2: (C12, C13, C14, C15, C16, C17); Cg5: (C25, C26, C27, C28, C29, C30); Cg6: (C31, C32, C33, C34,

C35, C36); Cg8: (C43, C44, C45, C46, C47, C48)

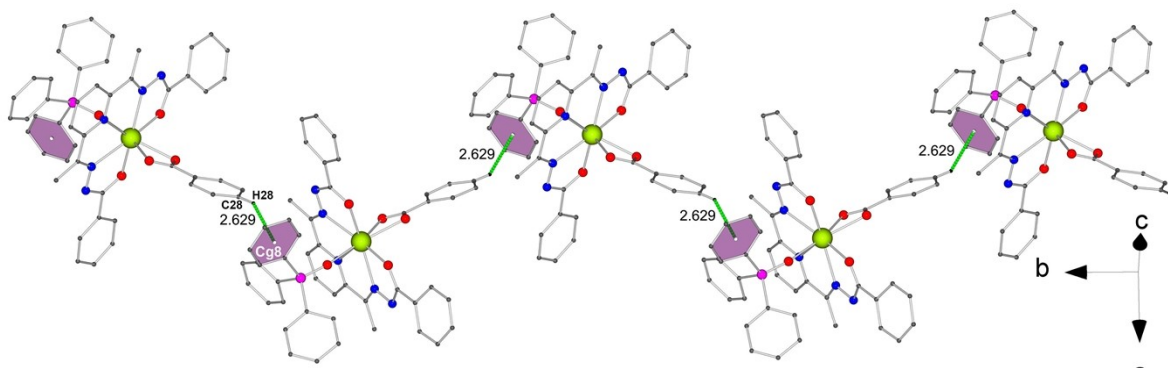

*C28-H28...Cg8 interaction*

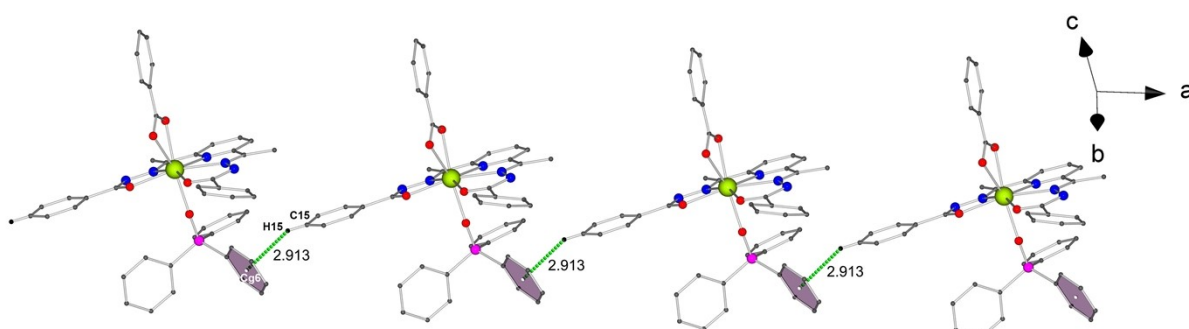

*C15-H15...Cg6 interaction*

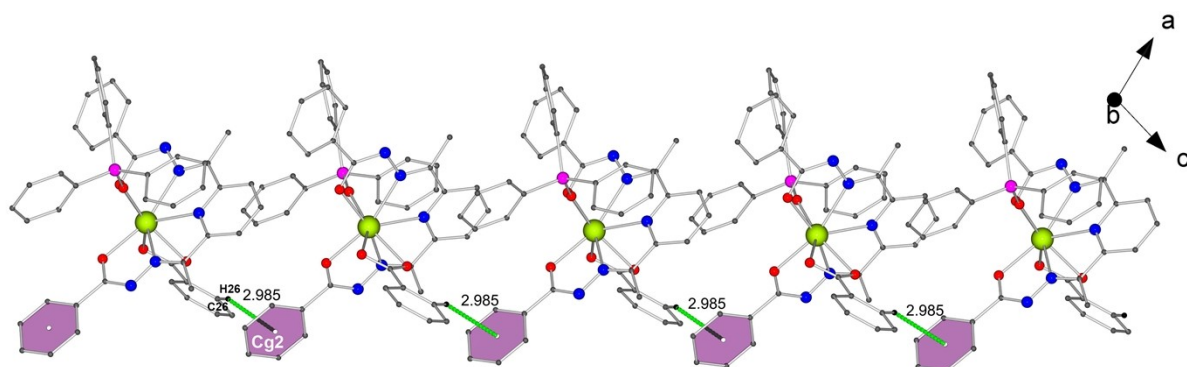

*C26-H26...Cg2 interaction*

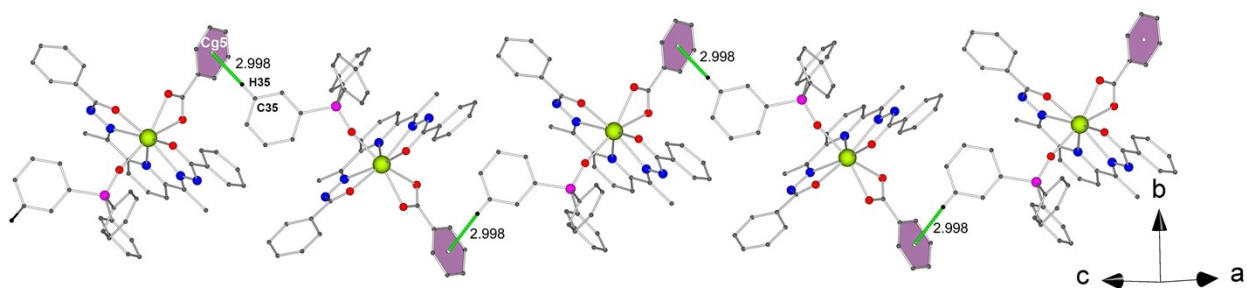

*C35-H35...Cg5 interaction*



**Figure S7.** Illustrations of different intermolecular X-H...Cg (Pi-Ring) interactions present in complex **1** (H-atoms except selected are omitted for clarity).

**Table S6.** Analysis of short ring-ring interactions with Cg-Cg distances < 5.0 Å, Alpha < 20.00° and Beta < 60.00° for **2**.

| Cg(I) | Cg(J) | [ARU(J)] | Cg-Cg     | Alpha  | Beta | Gamma | CgI Perp | CgJ Perp | Slippage |
|-------|-------|----------|-----------|--------|------|-------|----------|----------|----------|
| Cg1   | Cg6   | X,Y,Z    | 3.565(10) | 3.4(8) | 17.9 | 18.7  | 3.377(6) | 3.393(7) | 1.093    |

*Cg1:* (N3, C3, C4, C5, C6, C7); *Cg6:* (C35, C36, C37, C38, C39, C40)

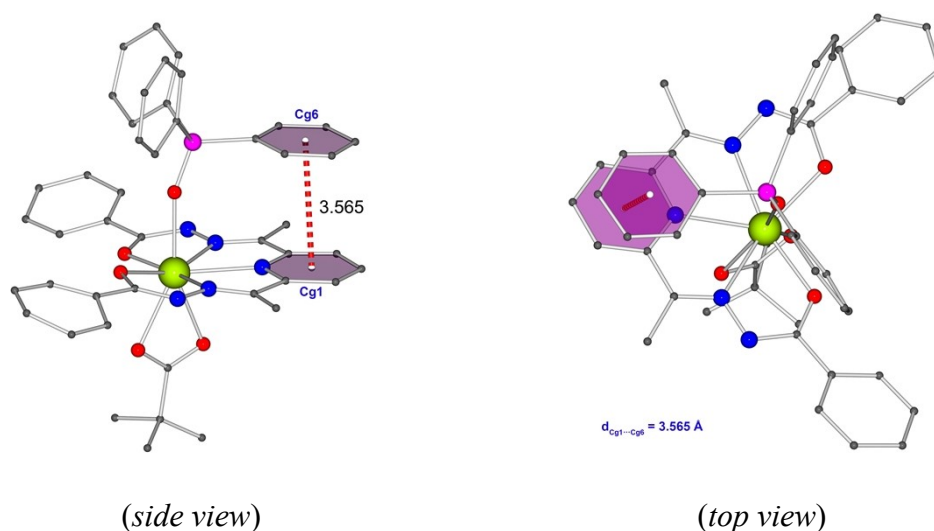

**Figure 8.** Illustrations of intramolecular  $\pi \cdots \pi$  ( $d_{Cg1 \cdots Cg6} = 3.565$  Å) stacking interaction in complex **2** (H-atoms are omitted for clarity).

**Table S7.** Analysis of X-H...Cg (Pi-ring) interactions ( $H \cdots Cg < 3.0$  Å, Gamma < 40.0°) for **2**.

| X-H(I)               | Cg(J) | [ARU(J)]            | H...Cg         | H-Perp         | Gamma           | X-H..Cg      | X..Cg                | X-H, Pi    |
|----------------------|-------|---------------------|----------------|----------------|-----------------|--------------|----------------------|------------|
| C27-H27B             | Cg6   | 1/2+X,3/2-Y,-1/2+Z  | 2.59           | -2.55          | 9.66            | 128          | 3.28(2)              | 48         |
| C49-H49<br>(C15-H15) | Cg7   | X,2-Y,-1/2+Z        | 2.90<br>(2.70) | 2.82<br>(2.67) | 13.48<br>(8.47) | 156<br>(161) | 3.78(3)<br>(3.61(7)) | 69<br>(48) |
| C17-H17              | Cg1   | -1/2+X,3/2-Y,-1/2+Z | 2.98           | 2.71           | 24.58           | 148          | 3.819(17)            | 43         |

*Cg1:* (N3, C3, C4, C5, C6, C7); *Cg6:* (C35, C36, C37, C38, C39, C40); *Cg7:* (C41, C42, C43, C44, C45, C46)

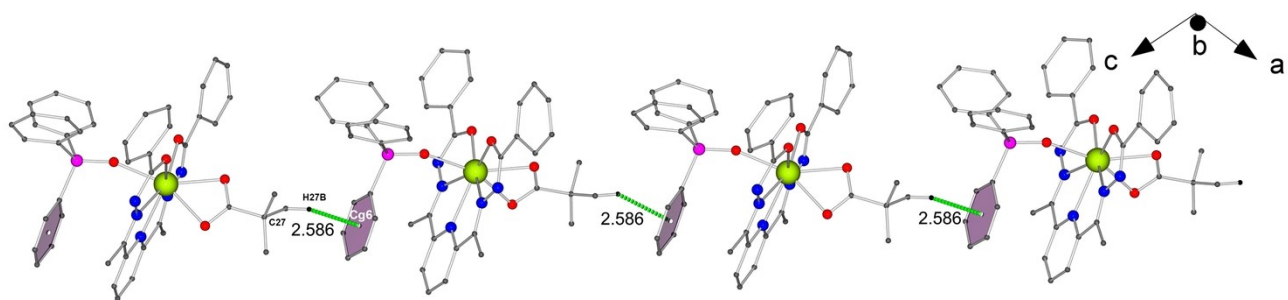

*C27–H27B...Cg6 interaction*

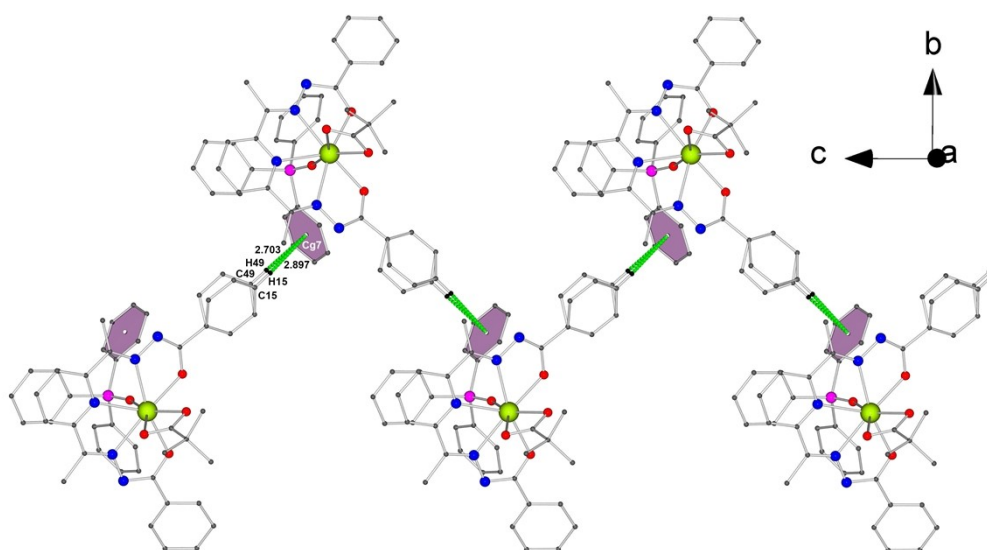

*C49(C15)–H49(H15) ...Cg7 interaction*

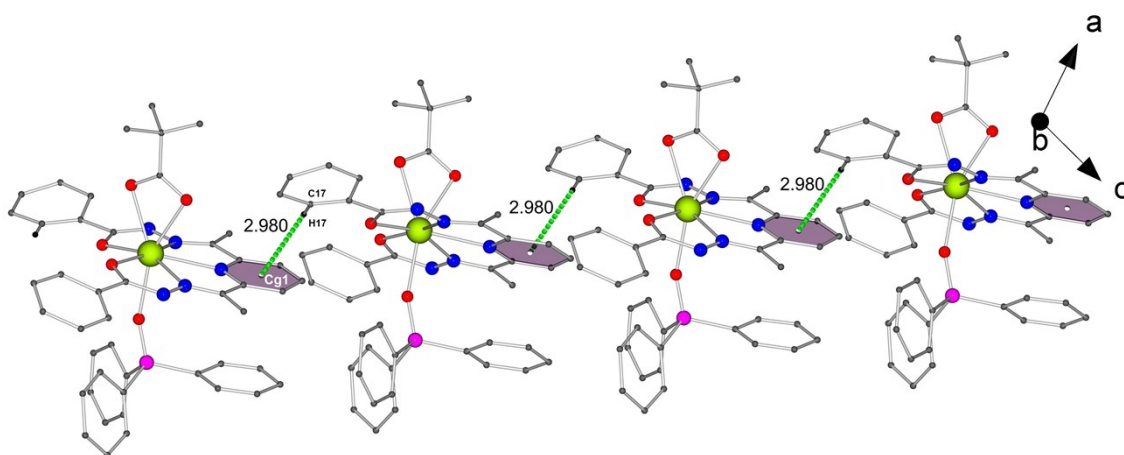

*C17–H17...Cg1 interaction*

**Figure S9.** Illustrations of different intermolecular C–H...Cg (Pi-ring) interactions present in complex **2** (All the H-atoms except selected are omitted for clarity).

**Table S8.** Analysis of short ring-interactions with Cg-Cg distances  $< 5.0 \text{ \AA}$ , Alpha  $< 20.00^\circ$  and Beta  $< 60.00^\circ$  for **3**.

| Cg(I) | Cg(J) | [ ARU(J)]   | Cg-Cg    | Alpha    | Beta | Gamm<br>a | CgI_Perp    | CgJ_Perp    | Slippage |
|-------|-------|-------------|----------|----------|------|-----------|-------------|-------------|----------|
| Cg1   | Cg3   | 1-X,1-Y,-Z  | 4.238(2) | 3.47(17) | 36.6 | 39.0      | 3.2954(13)  | 3.4033(16)  | 2.526    |
| Cg6   | Cg6   | 1-X,1-Y,1-Z | 3.673(2) | 0.0(2)   | 25.6 | 25.6      | -3.3127(17) | -3.3127(17) | 1.586    |

Cg1: (N3, C3, C4, C5, C6, C7); Cg3: (C18, C19, C20, C21, C22, C23); Cg6: (C38, C39, C40, C41, C42, C43)

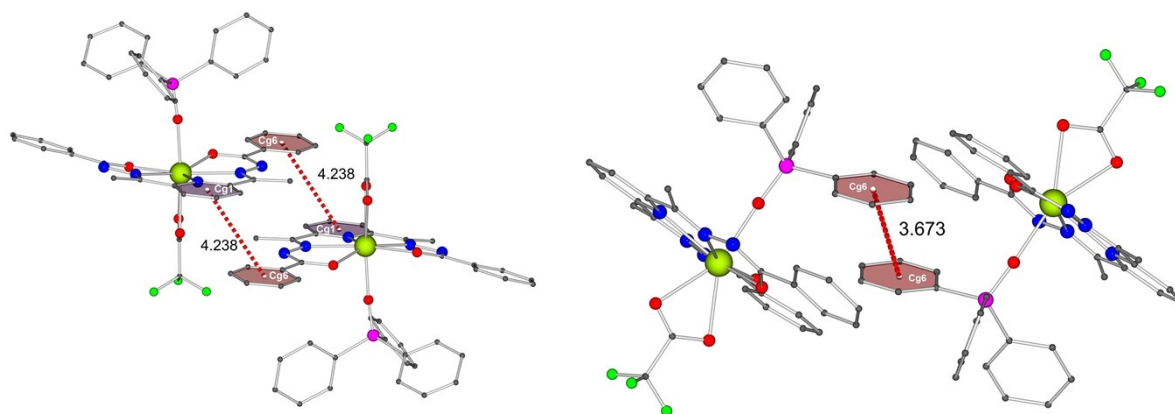

**Figure S10.** Illustrations of intramolecular  $\pi \cdots \pi$  ( $d_{Cg1 \cdots Cg3} = 4.238 \text{ \AA}$  (left) and  $d_{Cg6 \cdots Cg6} = 3.673 \text{ \AA}$  (right)) stacking interaction in complex **3** (H-atoms are omitted for clarity).

**Table S9.** Analysis of X-H $\cdots$ Cg (Pi-ring) interactions (H $\cdots$ Cg  $< 3.0 \text{ \AA}$ , Gamma  $< 40.0^\circ$ ) for **3**.

| X-H(I)   | Cg(J) | [ ARU(J)] | H $\cdots$ Cg | H-Perp | Gamm<br>a | X-H $\cdots$ Cg | X $\cdots$ Cg | X-H, Pi |
|----------|-------|-----------|---------------|--------|-----------|-----------------|---------------|---------|
| C11-H11A | Cg3   | X,1+Y,Z   | 2.86          | -2.75  | 16.18     | 130             | 3.555(4)      | 47      |

Cg3: (C18, C19, C20, C21, C22, C23)

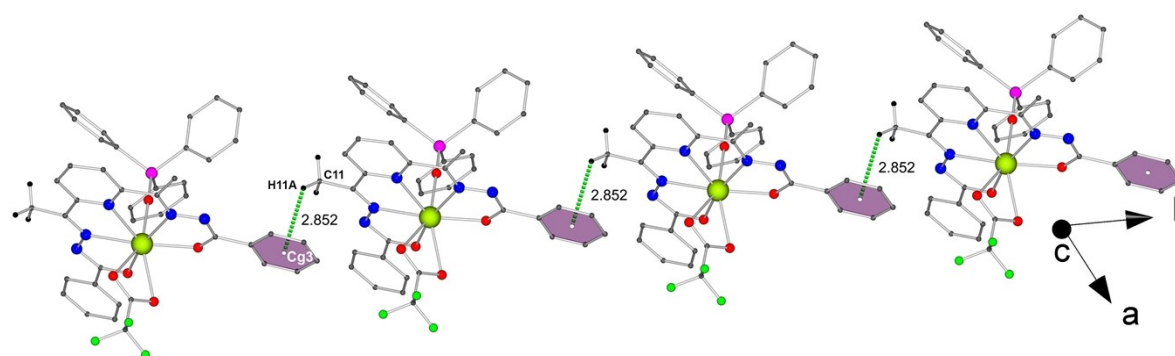

*C11-H11A $\cdots$ Cg3 interaction*

**Figure S11.** Illustrations of different intermolecular C-H...Cg (Pi-ring) interactions present in complex **3** (All the H-atoms except selected are omitted for clarity).

**Table S10.** Analysis of short ring-interactions with Cg-Cg distances  $< 5.0 \text{ \AA}$ , Alpha  $< 20.00^\circ$  and Beta  $< 60.00^\circ$  for **4**.

| Cg(I) | Cg(J) | [ ARU(J)]  | Cg-Cg    | Alpha  | Beta | Gamma | CgI_Perp    | CgJ_Perp  | Slippage |
|-------|-------|------------|----------|--------|------|-------|-------------|-----------|----------|
| Cg1   | Cg6   | X,Y,Z      | 3.821(3) | 6.3(2) | 20.7 | 26.9  | -3.4064(18) | 3.575(2)  | 1.350    |
| Cg1   | Cg2   | 1-X,1-Y,-Z | 4.251(3) | 2.3(2) | 37.8 | 39.3  | -3.2883(18) | -3.358(2) | 2.606    |
| Cg3   | Cg3   | -X,-Y,1-Z  | 4.849(3) | 0.0(2) | 40.2 | 40.2  | -3.701(2)   | 3.702(2)  | 3.132    |

Cg1: (N3, C3, C4, C5, C6, C7); Cg2: (C12, C13, C14, C15, C16, C17); Cg3: (C18, C19, C20, C21, C22, C23);

Cg6: (C34, C35, C36, C37, C38, C39)

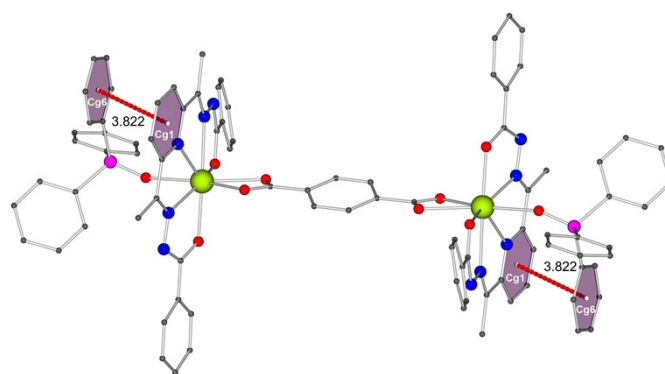

**Figure S12.** Illustration of intramolecular  $\pi \cdots \pi$  ( $d_{\text{Cg1} \cdots \text{Cg6}} = 3.822 \text{ \AA}$ ) stacking interaction in complex **4** (H-atoms are omitted for clarity).

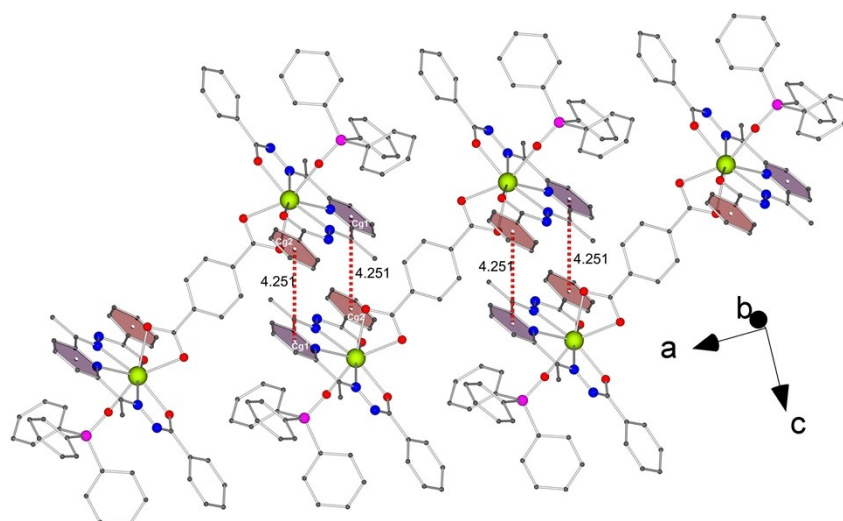

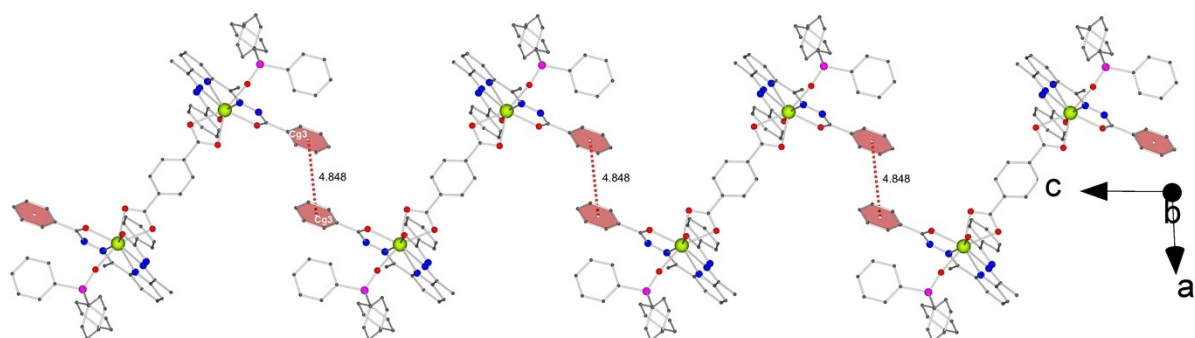

**Figure S13.** Illustrations of different intermolecular  $\pi\cdots\pi$  ( $d_{Cg1\cdots Cg2} = 4.251 \text{ \AA}$  (*top*) and  $d_{Cg3\cdots Cg3} = 4.848 \text{ \AA}$  (*bottom*)) stacking interaction in complex 4.

**Table S11.** Analysis of X-H $\cdots$ Cg (Pi-ring) interactions ( $H\cdots Cg < 3.0 \text{ \AA}$ ,  $\text{Gamma} < 40.0^\circ$ ) for

3.

| X-H(I)   | Cg(J) | [ ARU(J)]   | H...Cg | H-Perp | Gamm<br>a | X-H..Cg | X..Cg    | X-H, Pi |
|----------|-------|-------------|--------|--------|-----------|---------|----------|---------|
| C5-H5    | Cg4   | 1+X,Y,Z     | 2.83   | -2.78  | 11.67     | 147     | 3.661(6) | 60      |
| C10-H10B | Cg2   | X,-1+Y,Z    | 2.70   | 2.69   | 7.87      | 141     | 3.510(5) | 54      |
| C30-H30  | Cg3   | X,Y,Z       | 2.84   | 2.76   | 14.02     | 133     | 3.546(8) | 49      |
| C32-H32  | Cg6   | 2-X,1-Y,1-Z | 2.57   | 2.55   | 6.42      | 173     | 3.495(6) | 79      |

Cg2: (C12, C13, C14, C15, C16, C17); Cg3: (C18, C19, C20, C21, C22, C23); Cg4: (C25, C26, C27, C28, C29, C30); Cg6: (C34, C35, C36, C37, C38, C39)

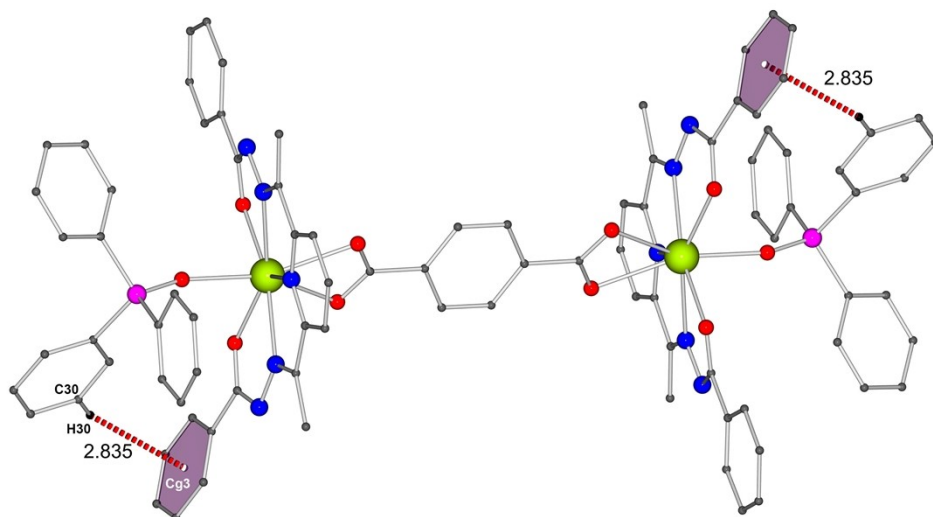

*C30-H30 $\cdots$ Cg3 interaction*

**Figure S14.** Illustration of intramolecular C-H $\cdots$ Cg (Pi-ring) interactions present in complex 4 (All the H-atoms except selected are omitted for clarity).

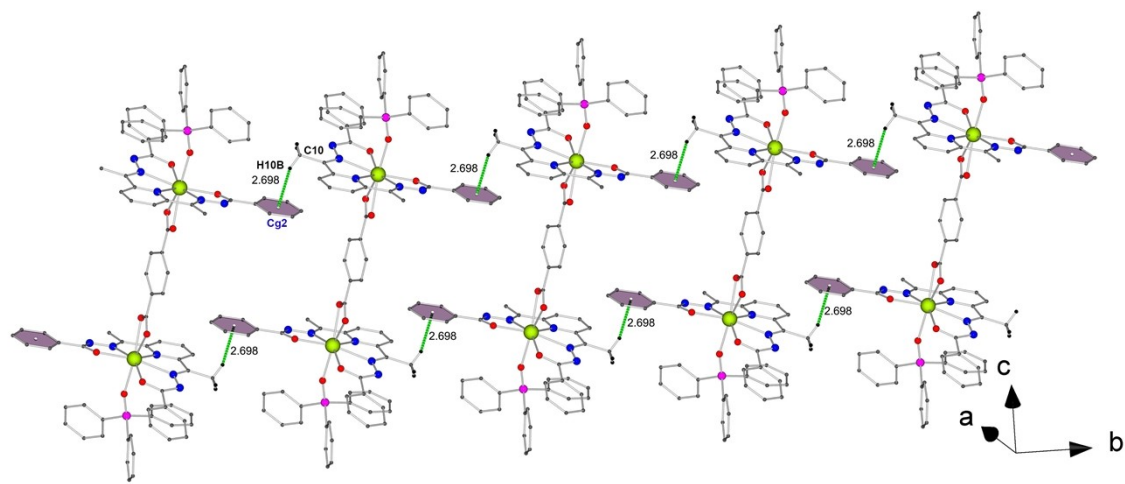

*C10-H10B...Cg2 interaction*

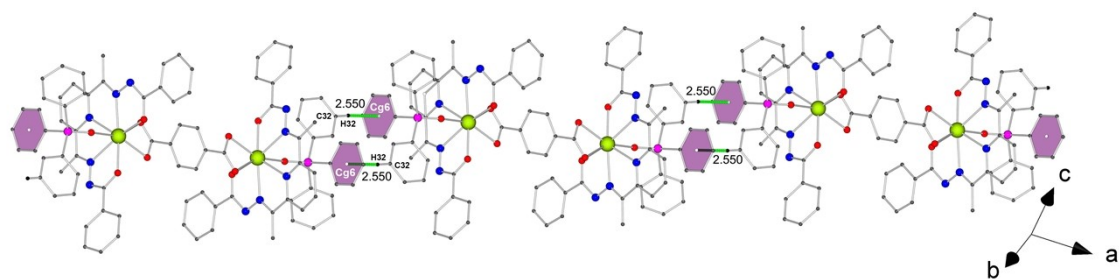

*C32-H32...Cg6 interaction*

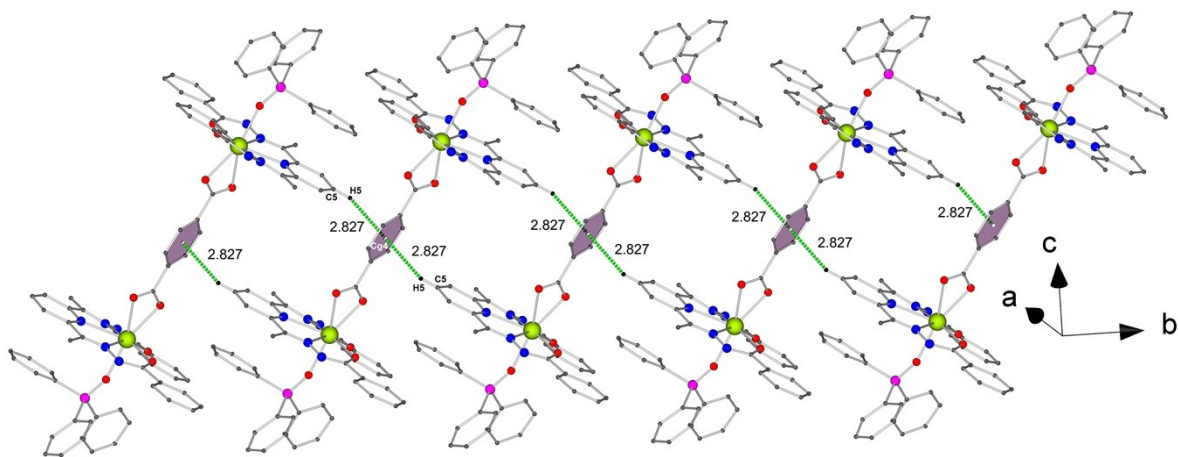

*C5-H5...Cg4 interaction*

**Figure S15.** Illustrations of different intermolecular C-H...Cg (Pi-ring) interactions present in complex 4 (All the H-atoms except selected are omitted for clarity).

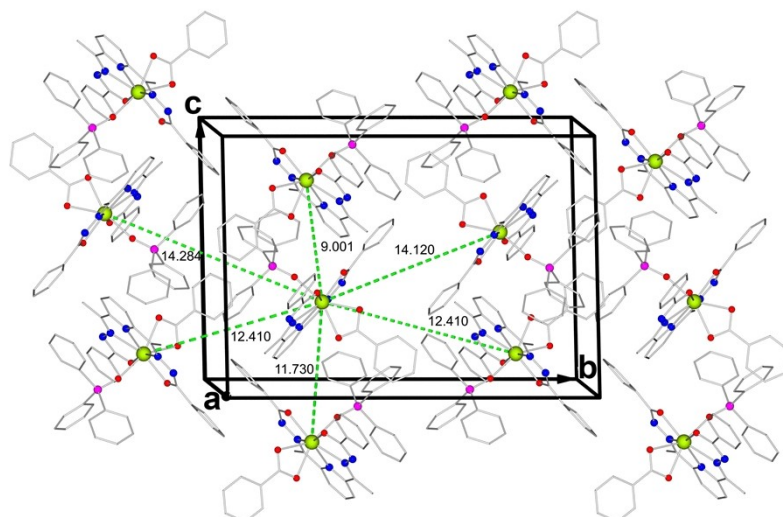

**Figure S16.** Solid-state packing diagram of complex **1** viewed along the crystallographic *a* axis. (H-atoms are omitted for clarity)

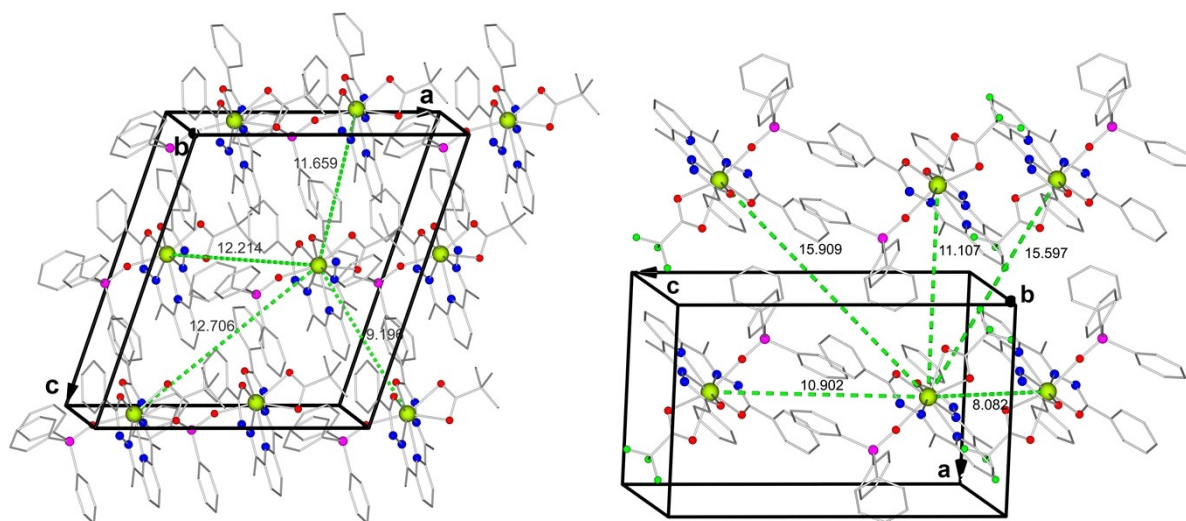

**Figure S17.** Solid-state packing diagram of complexes **2** (*left*) and **3** (*right*) viewed along the crystallographic *b* axis. (H-atoms are omitted for clarity)

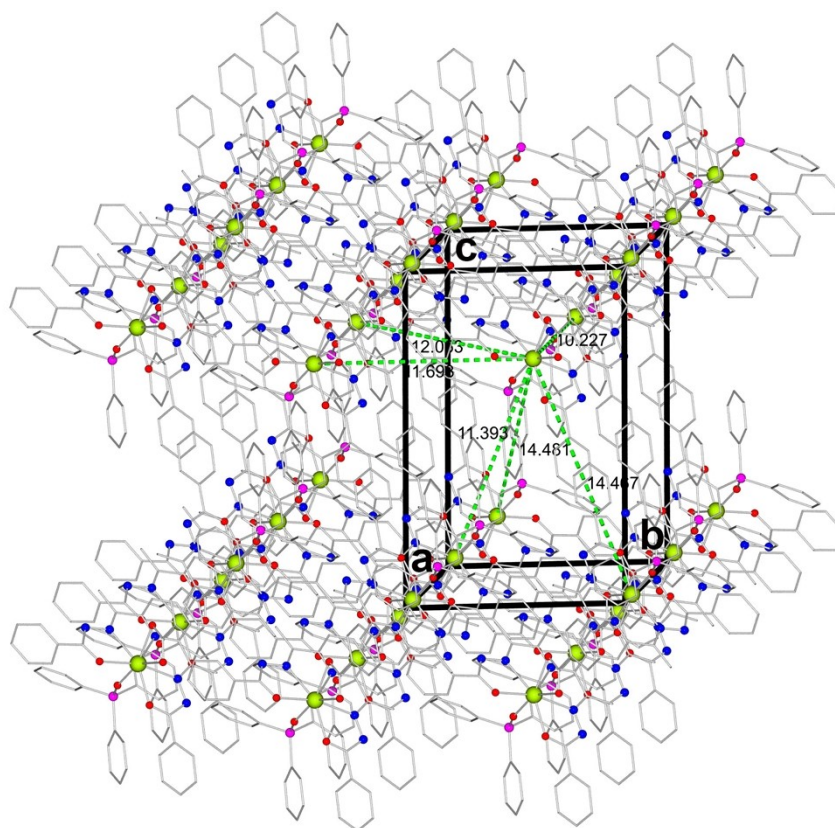

**Figure S18.** Solid-state packing diagram of complex **4** viewed along the crystallographic *a* axis. (H-atoms are omitted for clarity).

*Electronic supporting information for the Magnetism section*

**For Complex 1**

The low-temperature frequency-dependent ac susceptibility data for **1** were analyzed by using a generalized Debye model to fit the Cole–Cole plot (Figure S19):

$$\chi' = \chi_{\infty} + \frac{(\chi_0 - \chi_{\infty})[1 + (2\pi\nu_{ac}\tau)^{1-\alpha}\sin(\frac{\alpha\pi}{2})]}{1 + 2(2\pi\nu_{ac}\tau)^{1-\alpha}\sin(\frac{\alpha\pi}{2}) + (2\pi\nu_{ac}\tau)^{2(1-\alpha)}}$$

$$\chi'' = \frac{(\chi_0 - \chi_{\infty})(2\pi\nu_{ac}\tau)^{1-\alpha}\cos(\frac{\alpha\pi}{2})}{1 + 2(2\pi\nu_{ac}\tau)^{1-\alpha}\sin(\frac{\alpha\pi}{2}) + (2\pi\nu_{ac}\tau)^{2(1-\alpha)}}$$



where  $\chi_\infty$  is the adiabatic susceptibility (at  $\nu_{ac} \rightarrow \infty$ ),  $\chi_0$  is the isothermal susceptibility (at  $\nu_{ac} \rightarrow 0$ ) and  $\tau$  is the average relaxation time of magnetization.

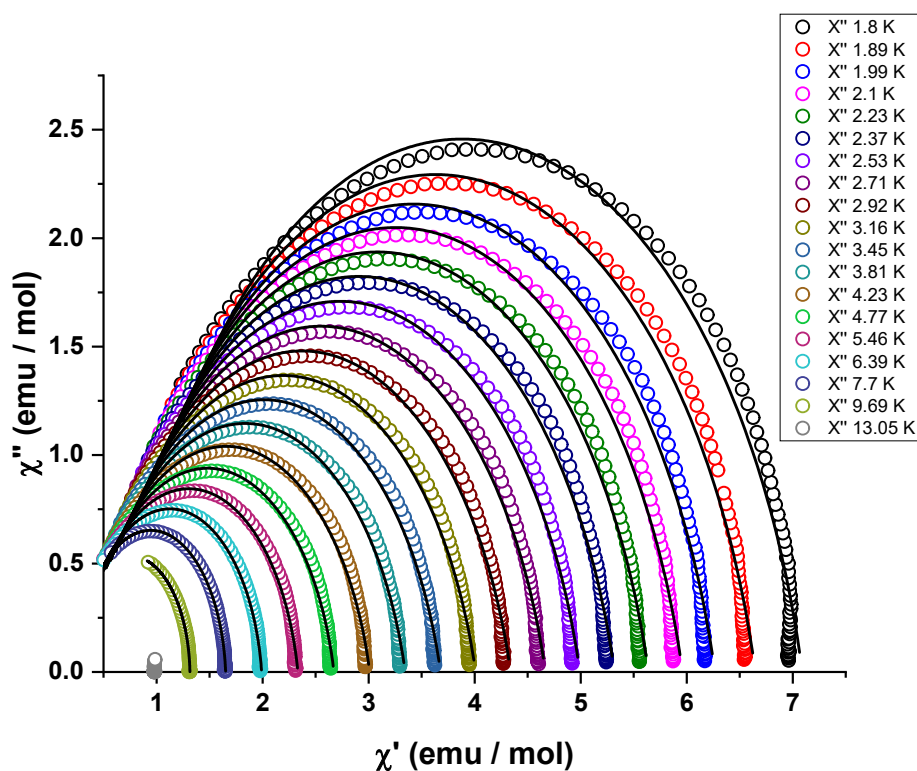

**Figure S19.** Cole–Cole plots for **1** at various temperatures and under an applied dc field of 0 Oe (open circles: experimental points, full lines: fits obtained with a generalized Debye model).

Although the fit is not perfect, likely due to a inhomogeneous distribution of the relaxation times, it provides satisfying parameters, collected in table S12 below:

**Table S12.** Parameters of the extended Debye model used to fit the Cole–Cole plots for **1** at various temperatures and under an applied dc field of 0 Oe.

| T (K) | $\chi_0$ (emu / mol) | $\chi_\infty$ (emu / mol) | $\tau$ (ms) | $\alpha$ |
|-------|----------------------|---------------------------|-------------|----------|
| 1.80  | 7.09094              | 0.67534                   | 0.999084    | 0.16779  |
| 1.89  | 6.6479               | 0.61784                   | 1.01        | 0.17207  |
| 1.99  | 6.26542              | 0.58107                   | 1.01        | 0.17341  |
| 2.10  | 5.96107              | 0.55097                   | 1.02        | 0.17465  |
| 2.23  | 5.63847              | 0.52789                   | 1.02        | 0.17437  |
| 2.37  | 5.31978              | 0.49245                   | 1.02        | 0.17618  |
| 2.53  | 4.99325              | 0.46305                   | 1.02        | 0.17708  |
| 2.71  | 4.6679               | 0.43328                   | 1.03        | 0.17836  |
| 2.92  | 4.33942              | 0.40593                   | 1.02        | 0.17863  |
| 3.16  | 4.0089               | 0.37832                   | 1.02        | 0.17829  |

|      |         |         |          |          |
|------|---------|---------|----------|----------|
| 3.45 | 3.67853 | 0.35181 | 1.00     | 0.17704  |
| 3.81 | 3.34529 | 0.32814 | 0.973896 | 0.17299  |
| 4.23 | 3.01125 | 0.30637 | 0.925244 | 0.16529  |
| 4.77 | 2.67337 | 0.28997 | 0.84289  | 0.15008  |
| 5.46 | 2.33327 | 0.2762  | 0.713188 | 0.12456  |
| 6.39 | 1.99119 | 0.26014 | 0.533501 | 0.08919  |
| 7.70 | 1.65149 | 0.23806 | 0.32552  | 0.050382 |
| 9.69 | 1.31463 | 0.21031 | 0.118634 | 0.02256  |

### For Complex 2

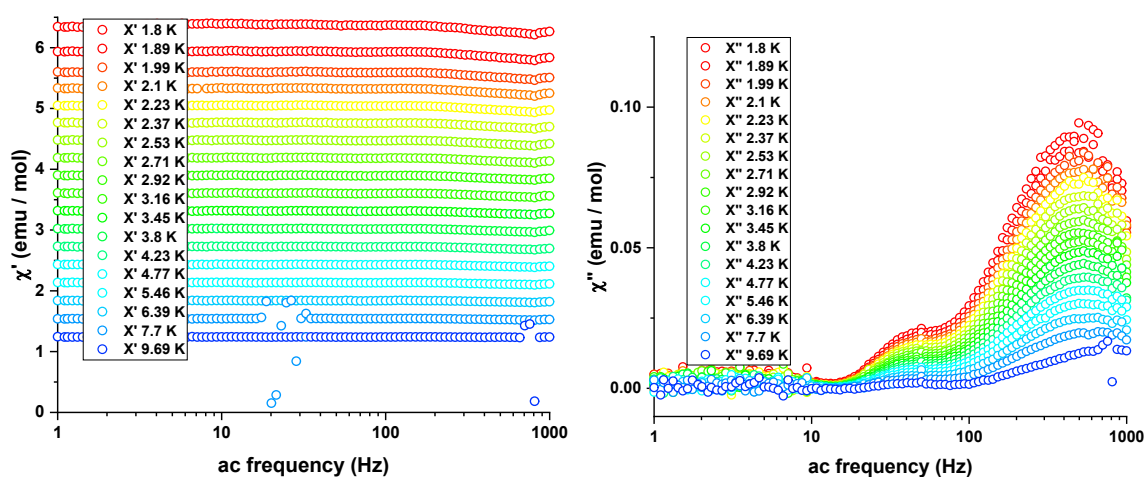

**Figure S20.** In-phase (*left*) and out-of-phase (*right*) susceptibility curves for complex **2** with an ac field of 2 Oe under a static dc field of 0 Oe at various temperatures.

The optimum field to reduce Quantum Tunneling of Magnetization for **2** was chosen as the one which provides the slowest magnetic relaxation. This determination was performed at 1.8 K (Figure S21).

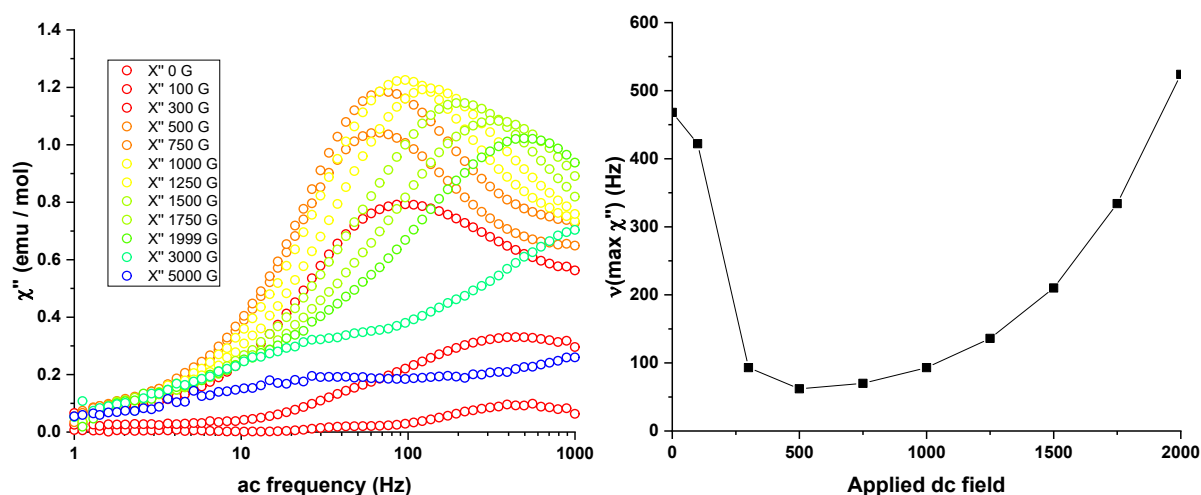

**Figure S21.** (left) out-of-phase susceptibility curves for complex **2** at 1.8 K with an ac field of 2 Oe and under various applied dc fields. (right) frequency of the maximum of  $\chi''$  as a function of the applied dc field at 1.8 K.

For **2**, the Cole-Cole plots (Figure S22) cannot be fitted by a generalized Debye model, likely due to a non-symmetrical distribution of the relaxation times. This asymmetry of the relaxation time distribution at 500 Oe can be due to the vicinity of different relaxation modes, difficult to separate from each-other, or to structural disorder.

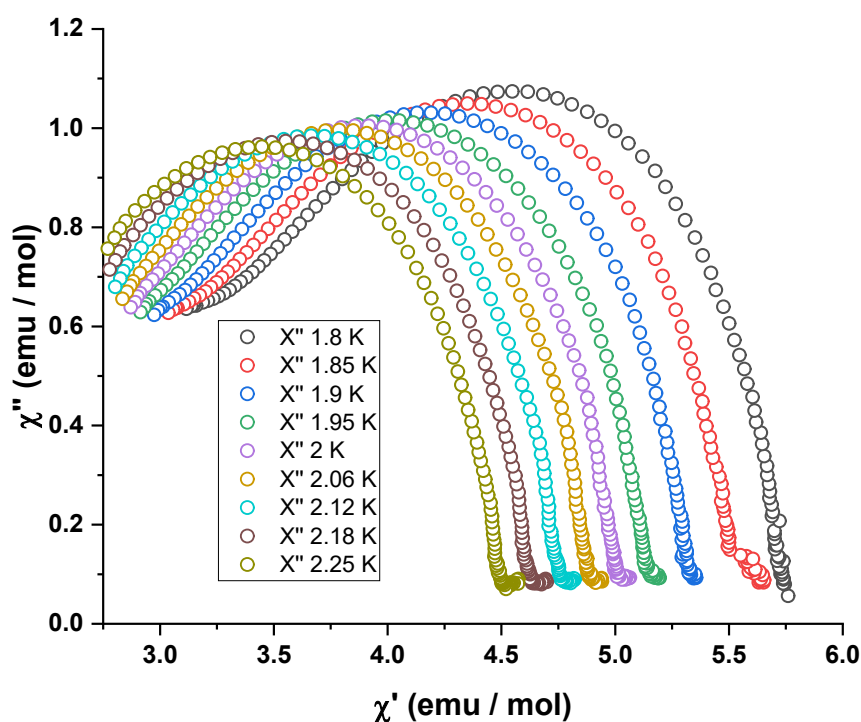

**Figure S22.** Cole-Cole plots for **2** under a static dc field of 500 Oe at various temperatures.

As a consequence, the relaxation times were determined manually, from the maxima of the  $\chi''$  curves (Table S13):

**Table S13.** Relaxation times for **2** at various temperatures and under an applied dc field of 500 Oe.

| T (K) | $\tau$ ( $\times 10^{-4}$ s) |
|-------|------------------------------|
| 1.80  | 24.2                         |
| 1.85  | 19.9                         |
| 1.90  | 15.6                         |
| 1.95  | 12.5                         |

|      |      |
|------|------|
| 2.00 | 10.1 |
| 2.06 | 8.48 |
| 2.12 | 6.89 |
| 2.18 | 5.59 |
| 2.25 | 4.53 |
| 2.32 | 3.50 |
| 2.40 | 2.75 |
| 2.49 | 2.16 |
| 2.58 | 1.70 |

### For Complex 3

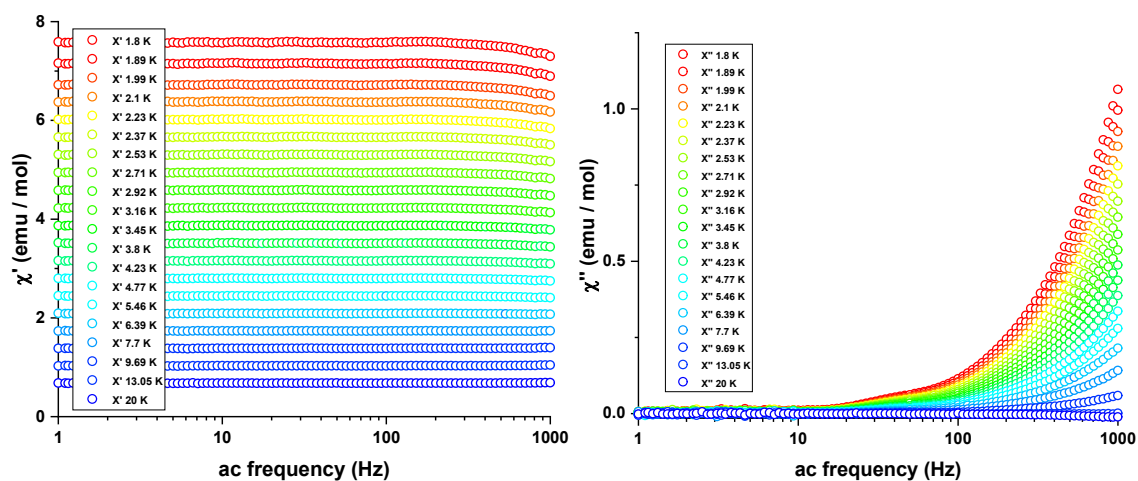

**Figure S23.** in-phase (*left*) and out-of-phase (*right*) susceptibility curves for complex **3** with an ac field of 2 Oe under a static dc field of 0 Oe at various temperatures.

The optimum field to reduce Quantum Tunnelling of Magnetization for **3** was chosen as the one which provides the slowest magnetic relaxation. At 1.8 K the frequency range available was not large enough to allow the precise determination of this optimum field (Figure S24 (top)). Therefore, this determination was performed at 3 K.

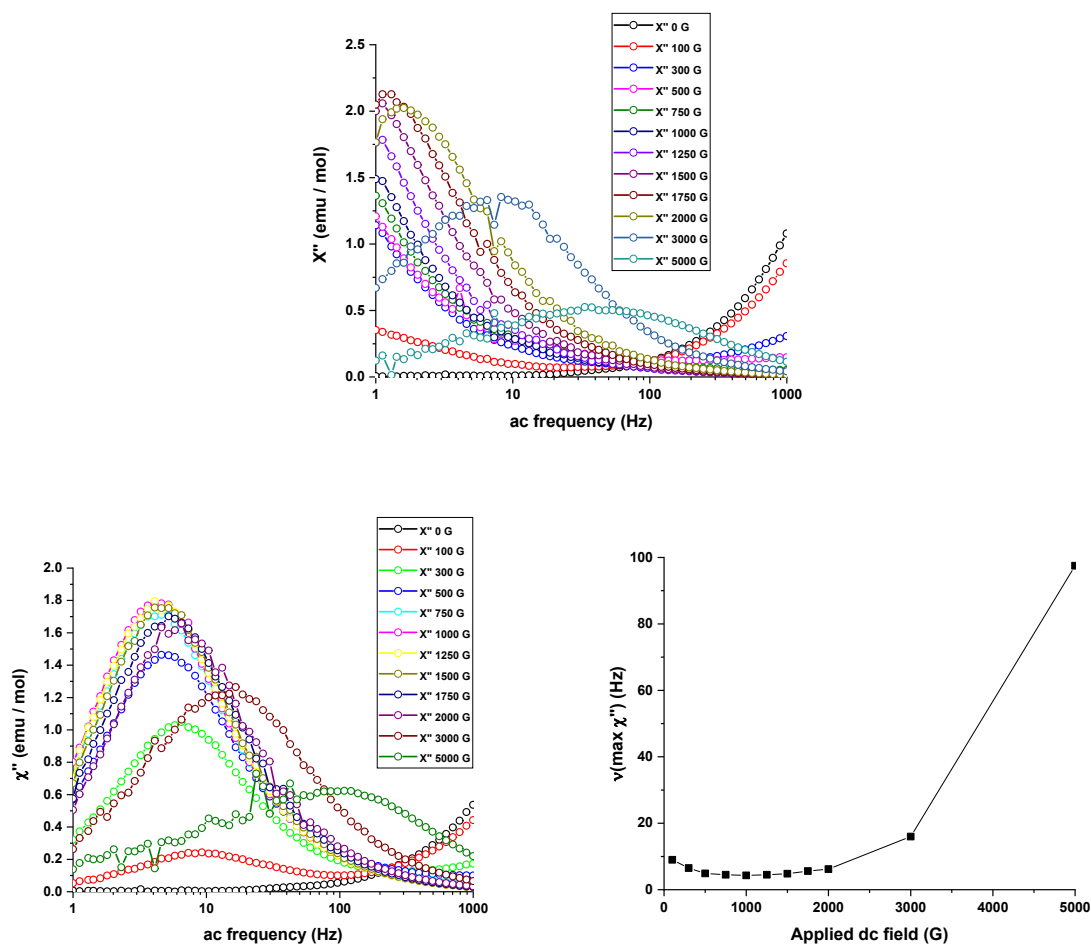

**Figure S24.** (top) Out-of-phase susceptibility curves for complex **3** at 1.8 K with an ac field of 2 Oe and under various applied dc fields. (Bottom left) out-of-phase susceptibility curves for complex **3** at 3 K with an ac field of 2 Oe and under various applied dc fields. (Bottom right) frequency of the maximum of  $\chi''$  as a function of the applied dc field at 3 K.

As can be seen on figure S24, there are (at least) two relaxations modes, one at high frequency in zero field, and another one at low frequencies, which appears when the applied dc field increases.

The low-temperature frequency-dependent ac susceptibility data were further analyzed by using a generalized Debye model to fit the Cole–Cole plot (Figure S25 and Table S14).

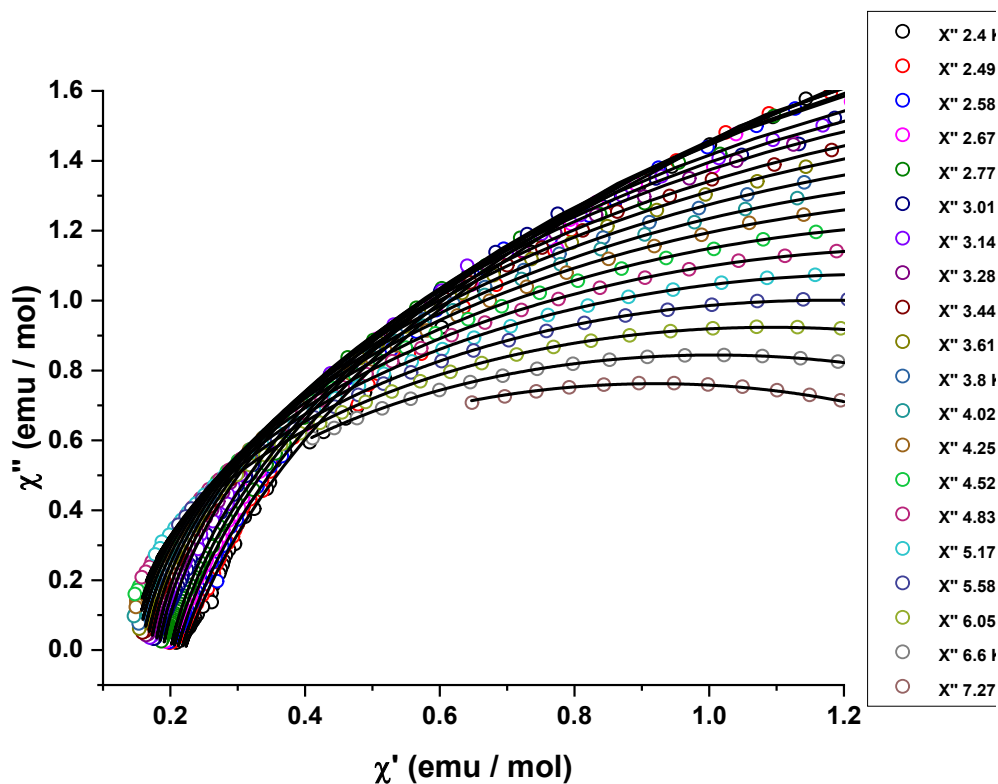

**Figure S25.** Cole-Cole plots for complex **3** under a static dc field of 1000 Oe at various temperatures.

The parameters obtained from the fits are collected in table S14 below:

**Table S14.** Parameters of the extended Debye model used to fit the Cole–Cole plots for **3** at various temperatures and under an applied dc field of 1000 Oe.

| T (K) | $\chi_0$ (emu / mol) | $\chi_\infty$ (emu / mol) | $\tau$ (s) | $\alpha$ |
|-------|----------------------|---------------------------|------------|----------|
| 1.80  | 12.2220              | 0.2627                    | 1.90319    | 0.2321   |
| 1.85  | 8.9578               | 0.2615                    | 1.04479    | 0.2147   |
| 1.90  | 8.8432               | 0.2541                    | 0.93656    | 0.2144   |
| 1.95  | 7.4482               | 0.2470                    | 0.62194    | 0.1834   |
| 2.00  | 7.5388               | 0.2448                    | 0.57998    | 0.1826   |
| 2.06  | 7.1515               | 0.2416                    | 0.48103    | 0.1714   |
| 2.12  | 6.5969               | 0.2377                    | 0.3779     | 0.1557   |
| 2.18  | 6.3283               | 0.2328                    | 0.31329    | 0.1462   |
| 2.25  | 5.9303               | 0.2281                    | 0.24791    | 0.1313   |
| 2.32  | 5.6339               | 0.2245                    | 0.19943    | 0.1196   |
| 2.40  | 5.3482               | 0.2213                    | 0.15899    | 0.1063   |
| 2.49  | 5.0972               | 0.2164                    | 0.12616    | 0.09563  |
| 2.58  | 4.8743               | 0.2101                    | 0.09988    | 0.08541  |
| 2.67  | 4.6785               | 0.2042                    | 0.07874    | 0.08015  |
| 2.77  | 4.4715               | 0.2000                    | 0.06114    | 0.06979  |

|      |        |        |            |         |
|------|--------|--------|------------|---------|
| 3.01 | 4.0908 | 0.1886 | 0.03628    | 0.05728 |
| 3.14 | 3.9119 | 0.1821 | 0.02763    | 0.05282 |
| 3.28 | 3.7366 | 0.1770 | 0.02088    | 0.04741 |
| 3.44 | 3.5691 | 0.1696 | 0.01564    | 0.04647 |
| 3.61 | 3.4025 | 0.1641 | 0.01156    | 0.04295 |
| 3.80 | 3.2375 | 0.1573 | 0.00848    | 0.04209 |
| 4.02 | 3.0679 | 0.1509 | 0.0061     | 0.04075 |
| 4.25 | 2.8968 | 0.1460 | 0.00433    | 0.03728 |
| 4.52 | 2.7287 | 0.1416 | 0.00304    | 0.03519 |
| 4.83 | 2.5583 | 0.1377 | 0.0021     | 0.03273 |
| 5.17 | 2.3903 | 0.1358 | 0.00142    | 0.02959 |
| 5.58 | 2.2188 | 0.1348 | 9.439*10-4 | 0.02555 |
| 6.05 | 2.0492 | 0.1339 | 6.129*10-4 | 0.02306 |
| 6.60 | 1.8786 | 0.1350 | 3.864*10-4 | 0.0204  |
| 7.27 | 1.7087 | 0.1317 | 2.334*10-4 | 0.02153 |
| 8.09 | 1.5383 | 0.1159 | 1.313*10-4 | 0.02459 |

The values of  $\alpha$  and  $\tau$  are consistent with those usually encountered for other SMMs (actually, it is better to limit oneself to 2.4-8 K for which a clear maximum of the  $\chi'' = f(\nu)$  is visible) The best fits of the Cole–Cole plots in the temperature range 2.4-8.09 K lead to very small  $\alpha$  values which indicates a narrow distribution of the relaxation times.

#### **For Complex 4**

From the plot of the frequency of the maximum of  $\chi''$  as a function of temperature, we can extract the various relaxation regimes under a 0 dc field (Table S14).

**Table S15.** Relaxation times for 4 at various temperatures and under an applied dc field of 0 Oe.

| T (K) | $\tau (\times 10^{-3} \text{ s})$ |
|-------|-----------------------------------|
| 1.80  | 22.93                             |
| 1.85  | 22.01                             |
| 1.90  | 21.71                             |
| 1.95  | 21.25                             |
| 2.00  | 20.97                             |
| 2.06  | 19.84                             |
| 2.12  | 19.46                             |
| 2.18  | 18.66                             |
| 2.25  | 16.68                             |
| 2.32  | 13.11                             |
| 2.40  | 8.20                              |
| 2.49  | 3.91                              |
| 2.58  | 0.231                             |

**Supporting information corresponding to the Computational section**

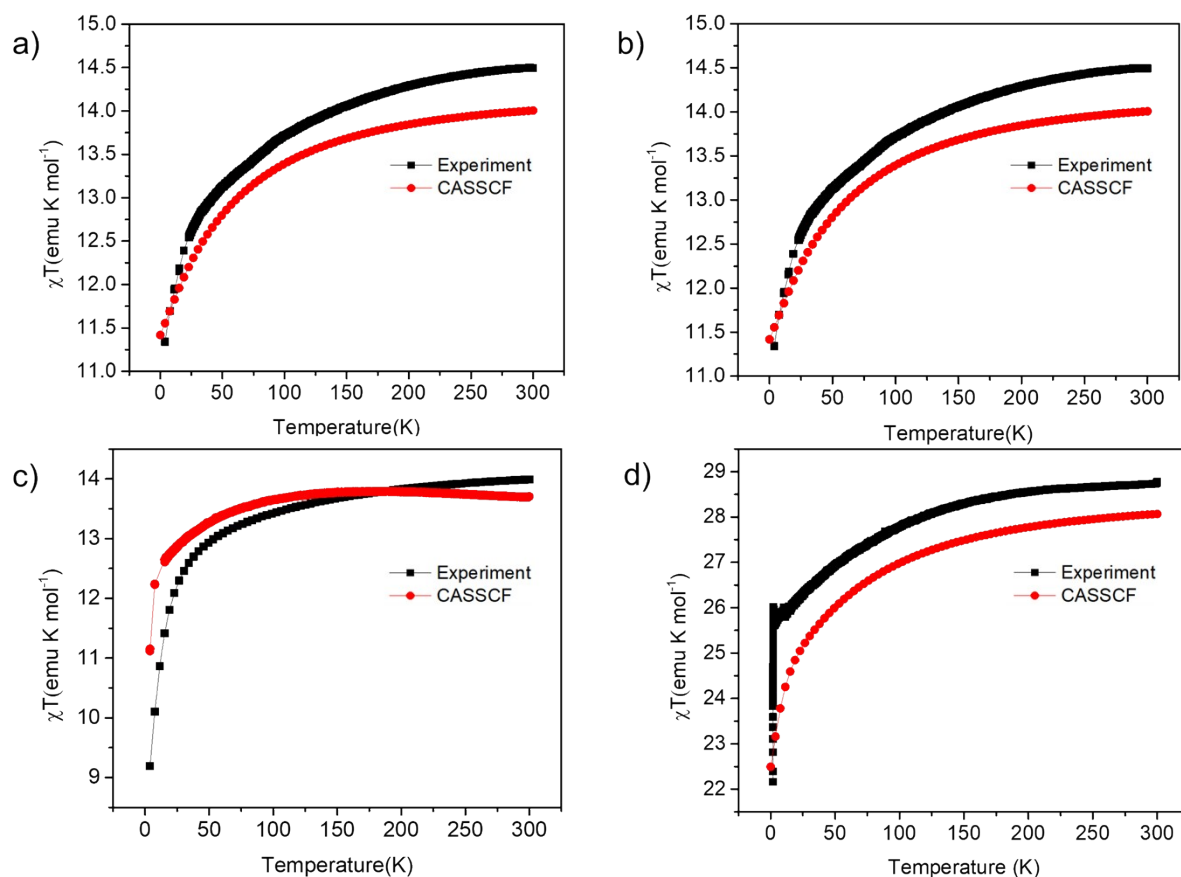

**Figure S26.** CASSCF computed  $\chi T$  versus  $T$  plots for complexes a) **1**, b) **2**, c) **3** and d) **4**. (For complex **4**, the CASSCF computed  $\chi T$  is the sum of the  $\chi T$  values of individual single Dy(III) ions).

**Table S16.** SINGLE\_ANISO computed  $g$ -values of the first excited KD,  $U_{\text{cal}}$  values tunneling coefficients for complexes **1–4**.

| Complexes      | $g_x$  | $g_y$  | $g_z$   | $U_{\text{cal}}/\text{cm}^{-1}$ | $k_{\text{QTM}}$ |
|----------------|--------|--------|---------|---------------------------------|------------------|
| <b>1</b>       | 0.9410 | 1.7807 | 17.5915 | 77.3                            | 7.73E-01         |
| <b>2</b>       | 0.1385 | 0.2350 | 19.0386 | 51.5                            | 7.01E-02         |
| <b>3</b>       | 1.2604 | 2.1540 | 10.6922 | 29.3                            | 5.73E-01         |
| <b>4(Dy@1)</b> | 0.0456 | 0.2451 | 19.1090 | 19.2                            | 0.54E-01         |
| <b>4(Dy@2)</b> | 0.0457 | 0.2450 | 19.1044 | 19.2                            | 0.54E-01         |



**Table S17.** Average axial and equatorial bond lengths of the hydrogen-optimised structures of complexes **1** to **4**.

|          | Avg. axial bond lengths | Avg. equatorial bond lengths | Avg. axial/Avg. equatorial |
|----------|-------------------------|------------------------------|----------------------------|
| <b>1</b> | 2.364                   | 2.409                        | 0.981                      |
| <b>2</b> | 2.372                   | 2.398                        | 0.989                      |
| <b>3</b> | 2.417                   | 2.398                        | 1.008                      |
| <b>4</b> | 2.389                   | 2.403                        | 0.994                      |

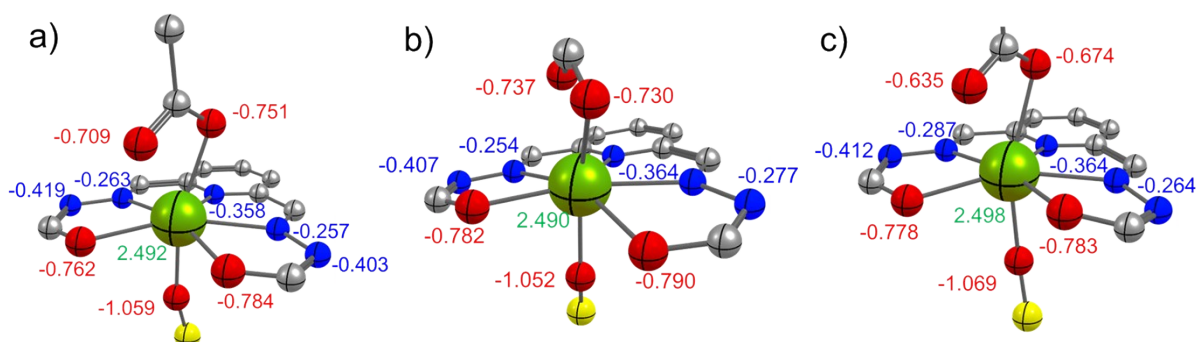

**Figure S27.** CASSCF computed LoProp charges on first coordination sphere of complex a) **1**, b) **2** and c) **3**. Color code: Green (Dy), red (O), blue (N), yellow (P), grey (C), and white (H).

**Table S18.** Average axial and equatorial LoProp charges of the hydrogen-optimised structures of complexes **1** to **4**.

|          | Avg. axial charge | Avg. equatorial charge | Avg. axial/Avg. equatorial |
|----------|-------------------|------------------------|----------------------------|
| <b>1</b> | -0.839            | -0.463                 | 1.812                      |
| <b>2</b> | -0.839            | -0.466                 | 1.800                      |
| <b>3</b> | -0.792            | -0.470                 | 1.685                      |
| <b>4</b> | -0.834            | -0.464                 | 1.797                      |

**Table S19.** SINGLE\_ANISO computed g-tensors, the angle of deviation from ground state  $g_{zz}$  orientation and relative energies of eight low lying Kramers doublets for complex 1.

| KDs Energy (cm <sup>-1</sup> ) | $g_{xx}$ | $g_{yy}$ | $g_{zz}$ | $\theta$ (° angle) |
|--------------------------------|----------|----------|----------|--------------------|
| 0.0                            | 0.0247   | 0.1323   | 19.3280  | 0.0                |
| 77.3                           | 0.9410   | 1.7807   | 17.5915  | 123.1              |
| 127.4                          | 0.4942   | 1.8501   | 15.5875  | 77.3               |
| 204.2                          | 10.2148  | 7.1521   | 1.6993   | 105.5              |
| 263.7                          | 2.2631   | 5.2233   | 8.6812   | 99.0               |
| 347.9                          | 3.2628   | 5.3634   | 12.4348  | 99.6               |
| 391.2                          | 0.6043   | 2.4534   | 13.5932  | 112.8              |
| 522.2                          | 0.2686   | 0.4796   | 19.1076  | 82.2               |

**Table S20.** SINGLE\_ANISO computed g-tensors, the angle of deviation from ground state  $g_{zz}$  orientation and relative energies of eight low lying Kramer's doublets for complex 2.

| KDs Energy (cm <sup>-1</sup> ) | $g_{xx}$ | $g_{yy}$ | $g_{zz}$ | $\theta$ (° angle) |
|--------------------------------|----------|----------|----------|--------------------|
| 0.0                            | 0.0396   | 0.0987   | 19.1108  | 0.0                |
| 51.5                           | 0.1385   | 0.2350   | 19.0386  | 39.8               |
| 184.9                          | 1.5693   | 3.9933   | 11.9934  | 120.6              |
| 223.7                          | 0.5069   | 4.4031   | 10.1096  | 98.8               |
| 295.3                          | 1.1848   | 4.7400   | 12.3350  | 92.9               |
| 386.2                          | 8.9957   | 5.5956   | 1.2168   | 84.9               |
| 453.4                          | 2.3974   | 3.3495   | 15.3809  | 85.6               |
| 519.8                          | 0.6028   | 0.8034   | 18.2136  | 105.5              |

**Table S21.** SINGLE\_ANISO computed g-tensors, the angle of deviation from ground state  $g_{zz}$  orientation and relative energies of eight low lying Kramers doublets for complex 3.

| KDs Energy (cm <sup>-1</sup> ) | $g_{xx}$ | $g_{yy}$ | $g_{zz}$ | $\theta$ (° angle) |
|--------------------------------|----------|----------|----------|--------------------|
| 0.0                            | 0.9045   | 4.9999   | 15.4227  | 0.0                |
| 29.3                           | 1.2604   | 2.1540   | 10.6922  | 4.8                |
| 86.3                           | 1.7257   | 2.5601   | 13.8132  | 134.8              |
| 249.8                          | 1.3605   | 2.8596   | 12.1206  | 13.7               |
| 340.0                          | 7.1486   | 6.2165   | 2.8538   | 45.6               |
| 405.9                          | 0.0010   | 2.7413   | 15.7742  | 91.7               |

|       |        |        |         |       |
|-------|--------|--------|---------|-------|
| 467.2 | 1.8289 | 2.4401 | 15.0049 | 111.8 |
| 545.7 | 0.7797 | 0.8794 | 17.9124 | 74.8  |

**Table S22.** SINGLE\_ANISO computed g-tensors, the angle of deviation from ground state  $g_{zz}$  orientation and relative energies of eight low lying Kramers doublets for Dy1 and Dy2 in complex **4** centers respectively.

| 4 (Dy1)                        |          |          |          |                    | 4(Dy2)                         |          |          |          |                    |
|--------------------------------|----------|----------|----------|--------------------|--------------------------------|----------|----------|----------|--------------------|
| KDs Energy (cm <sup>-1</sup> ) | $g_{xx}$ | $g_{yy}$ | $g_{zz}$ | $\theta$ (° angle) | KDs Energy (cm <sup>-1</sup> ) | $g_{xx}$ | $g_{yy}$ | $g_{zz}$ | $\theta$ (° angle) |
| 0.0                            | 0.0269   | 0.2055   | 18.9596  | 0.0                | 0.0                            | 0.0267   | 0.2054   | 18.9553  | 0.0                |
| 19.2                           | 0.0456   | 0.2451   | 19.1090  | 144.3              | 19.2                           | 0.0457   | 0.2450   | 19.1044  | 144.3              |
| 167.0                          | 0.9280   | 2.1526   | 13.4089  | 54.2               | 167.1                          | 0.9276   | 2.1507   | 13.3990  | 54.2               |
| 213.4                          | 0.2445   | 3.6562   | 10.5788  | 70.1               | 213.5                          | 0.2480   | 3.6552   | 10.5751  | 70.1               |
| 289.051                        | 1.5649   | 4.7243   | 13.1777  | 87.0               | 289.1                          | 1.5678   | 4.7214   | 13.1776  | 87.0               |
| 363.1                          | 1.0120   | 3.6310   | 9.8583   | 69.3               | 363.1                          | 1.0098   | 3.6276   | 9.8543   | 69.4               |
| 443.3                          | 2.6744   | 3.4454   | 13.5924  | 104.4              | 443.4                          | 2.6738   | 3.4443   | 13.5914  | 104.3              |
| 529.8                          | 0.5164   | 0.9615   | 17.9174  | 68.3               | 529.8                          | 0.5159   | 0.9607   | 17.9120  | 68.3               |

**Table S23.** SINGLE\_ANISO computed crystal field parameters for **1**, **2**, **3** and **4**. The CF

parameters were computed using the following equation, 
$$H_{CF} = \sum_{k=-q}^q B_k^q O_k^q$$
 and here  $B_k^q$  and  $O_k^q$  are the crystal field parameters and Steven's operator, respectively.

| k | Q  | $B_k^q$  |           |           |           |           |
|---|----|----------|-----------|-----------|-----------|-----------|
|   |    | 1        | 2         | 3         | 4         |           |
|   |    |          |           |           | Dy1       | Dy2       |
| 2 | -2 | 2.03E+00 | -7.46E-01 | -2.16E-01 | -6.70E-01 | -6.74E-01 |
|   | -1 | 7.41E-01 | -2.35E+00 | -5.50E-01 | -3.13E+00 | -3.14E+00 |

|   |           |           |           |           |           |           |
|---|-----------|-----------|-----------|-----------|-----------|-----------|
|   | 0         | -1.43E+00 | -1.87E+00 | -1.66E+00 | -1.91E+00 | -1.91E+00 |
|   | 1         | -6.99E-01 | -2.59E+00 | 9.61E-02  | -3.17E+00 | -3.17E+00 |
|   | 2         | 9.03E-01  | -7.46E-01 | 3.66E+00  | 1.01E+00  | 1.01E+00  |
| 4 | -4        | 4.27E-02  | 2.89E-02  | -4.55E-03 | 3.28E-02  | 3.26E-02  |
|   | -3        | 2.89E-02  | -1.42E-02 | -7.03E-02 | -1.32E-02 | -1.31E-02 |
|   | -2        | 2.31E-03  | 5.96E-03  | 7.95E-03  | 5.06E-03  | 5.15E-03  |
|   | -1        | 1.20E-02  | -9.32E-03 | -1.49E-02 | -1.32E-03 | -1.39E-03 |
|   | 0         | -2.67E-03 | -2.68E-03 | -2.26E-03 | -3.13E-03 | -3.13E-03 |
|   | 1         | -1.98E-02 | -3.13E-03 | -2.04E-03 | -4.77E-04 | -4.92E-04 |
|   | 2         | 7.33E-03  | 1.76E-04  | 2.87E-02  | -3.39E-03 | -3.44E-03 |
|   | 3         | -6.24E-03 | 2.12E-02  | 3.66E-02  | 1.85E-02  | 1.86E-02  |
| 6 | 4         | 1.32E-02  | 3.63E-02  | -1.65E-02 | 3.02E-02  | 3.04E-02  |
|   | -6        | 1.95E-05  | -5.91E-05 | -1.17E-04 | 1.52E-05  | 1.46E-05  |
|   | -5        | 3.30E-04  | -3.19E-04 | 4.78E-04  | -6.38E-04 | -6.39E-04 |
|   | -4        | 4.01E-05  | -1.32E-05 | 9.36E-05  | -6.28E-05 | -6.18E-05 |
|   | -3        | 1.32E-04  | 1.62E-04  | 3.03E-04  | 1.96E-04  | 1.93E-04  |
|   | -2        | -4.07E-04 | 3.30E-04  | 5.53E-05  | 2.00E-04  | 2.01E-04  |
|   | -1        | -2.38E-04 | 3.92E-04  | 5.87E-04  | 4.23E-04  | 4.22E-04  |
|   | 0         | -2.27E-05 | -8.93E-07 | 9.74E-07  | 1.64E-05  | 1.63E-05  |
| 1 | 1.83E-04  | 2.91E-04  | 2.38E-05  | 3.08E-04  | 3.09E-04  |           |
| 2 | 2.14E-04  | -8.02E-05 | -7.66E-05 | -1.24E-05 | -1.28E-05 |           |
| 3 | -5.79E-06 | 4.56E-04  | -2.30E-05 | 4.82E-04  | 4.83E-04  |           |
| 4 | 6.99E-05  | 3.72E-05  | 1.53E-04  | 4.41E-05  | 4.31E-05  |           |
| 5 | 7.67E-05  | -1.24E-04 | 1.58E-04  | 1.03E-04  | 9.68E-05  |           |
| 6 | -1.22E-04 | 1.04E-04  | -2.04E-04 | 9.61E-05  | 9.69E-05  |           |

**Table S24.** SINGLE\_ANISO computed wave function decomposition analysis for Dy centre in complex 1. The major dominating values are kept in bold.

| $\pm mJ$ | <i>wave function decomposition analysis of complex 1</i>                                                                                                               |
|----------|------------------------------------------------------------------------------------------------------------------------------------------------------------------------|
| KD1      | <b>89.9%</b> $ \pm 15/2\rangle + 8.2\%$ $ \pm 11/2\rangle$                                                                                                             |
| KD2      | <b>23.1%</b> $ \pm 13/2\rangle + 21.8\%$ $ \pm 11/2\rangle + 16.4\%$ $ \pm 9/2\rangle + 14.2\%$ $ \pm 7/2\rangle + 10.3\%$ $ \pm 5/2\rangle + 8.1\%$ $ \pm 3/2\rangle$ |
| KD3      | <b>22.9%</b> $ \pm 5/2\rangle + 22.2\%$ $ \pm 7/2\rangle + 16.1\%$ $ \pm 9/2\rangle + 12.6\%$ $ \pm 3/2\rangle + 10.4\%$ $ \pm 13/2\rangle + 5.3\%$ $ \pm 1/2\rangle$  |
| KD4      | <b>31.4%</b> $ \pm 13/2\rangle + 21.6\%$ $ \pm 9/2\rangle + 11.2\%$ $ \pm 7/2\rangle + 14.1\%$ $ \pm 5/2\rangle + 12.1\%$ $ \pm 1/2\rangle + 8.8\%$ $ \pm 3/2\rangle$  |
| KD5      | <b>25.7%</b> $ \pm 1/2\rangle + 23.1\%$ $ \pm 13/2\rangle + 18.3\%$ $ \pm 3/2\rangle + 12.6\%$ $ \pm 7/2\rangle + 7.4\%$ $ \pm 11/2\rangle$                            |
| KD6      | <b>26.4%</b> $ \pm 3/2\rangle + 26.1\%$ $ \pm 1/2\rangle + 25.6\%$ $ \pm 11/2\rangle + 7.9\%$ $ \pm 9/2\rangle + 6.1\%$ $ \pm 5/2\rangle$                              |
| KD7      | <b>21.6%</b> $ \pm 5/2\rangle + 21.5\%$ $ \pm 11/2\rangle + 21.4\%$ $ \pm 7/2\rangle + 20.3\%$ $ \pm 9/2\rangle + 8.0\%$ $ \pm 13/2\rangle$                            |
| KD8      | <b>24.0%</b> $ \pm 3/2\rangle + 22.4\%$ $ \pm 1/2\rangle + 20.4\%$ $ \pm 5/2\rangle + 15.2\%$ $ \pm 7/2\rangle + 10.4\%$ $ \pm 9/2\rangle$                             |

**Table S25.** SINGLE\_ANISO computed wave function decomposition analysis for Dy centre in complex 2. The major dominating values are kept in bold.

| $\pm mJ$ | <i>wave function decomposition analysis of complex 2</i>                                                                                                              |
|----------|-----------------------------------------------------------------------------------------------------------------------------------------------------------------------|
| KD1      | <b>86.1%</b> $ \pm 15/2\rangle$ + 9.0% $ \pm 11/2\rangle$                                                                                                             |
| KD2      | <b>41.3%</b> $ \pm 13/2\rangle$ + 25.4% $ \pm 11/2\rangle$ + 10.7 % $ \pm 9/2\rangle$ + 8.9% $ \pm 7/2\rangle$ + 7.3% $ \pm 15/2\rangle$                              |
| KD3      | <b>29.9%</b> $ \pm 13/2\rangle$ + 21.6% $ \pm 9/2\rangle$ + 16.9% $ \pm 1/2\rangle$ + 10.9% $ \pm 5/2\rangle$ + 10.1 % $ \pm 3/2\rangle$                              |
| KD4      | <b>22.7%</b> $ \pm 3/2\rangle$ + 18.4% $ \pm 9/2\rangle$ + 13.0 % $ \pm 5/2\rangle$ + 13.8 % $ \pm 13/2\rangle$ + 12.4 % $ \pm 11/2\rangle$ + 10.4% $ \pm 1/2\rangle$ |
| KD5      | <b>32.0%</b> $ \pm 7/2\rangle$ + 22.7 % $ \pm 5/2\rangle$ + 21.5% $ \pm 1/2\rangle$ + 10.9% $ \pm 3/2\rangle$ + 5.4% $ \pm 11/2\rangle$                               |
| KD6      | <b>31.6%</b> $ \pm 11/2\rangle$ + 15.9% $ \pm 5/2\rangle$ + 15.1% $ \pm 3/2\rangle$ + 13.3% $ \pm 7/2\rangle$ + 9.8 % $ \pm 9/2\rangle$ + 17.6% $ \pm 1/2\rangle$     |
| KD7      | <b>25.0%</b> $ \pm 1/2\rangle$ + 18.3% $ \pm 3/2\rangle$ + 16.8% $ \pm 9/2\rangle$ + 16.2 % $ \pm 7/2\rangle$ + 14.5% $ \pm 5/2\rangle$                               |
| KD8      | <b>20.8%</b> $ \pm 3/2\rangle$ + 18.9% $ \pm 5/2\rangle$ + 19.0% $ \pm 9/2\rangle$ + 17.4% $ \pm 1/2\rangle$ + 13.0 % $ \pm 7/2\rangle$                               |

**Table S26.** SINGLE\_ANISO computed wave function decomposition analysis for Dy centre in complex 3. The major dominating values are kept in bold.

| $\pm mJ$ | <i>wave function decomposition analysis of complex 3</i>                                                                                                                     |
|----------|------------------------------------------------------------------------------------------------------------------------------------------------------------------------------|
| KD1      | <b>56.7%</b> $ \pm 15/2\rangle$ + 24.6% $ \pm 11/2\rangle$ + 7.4 % $ \pm 7/2\rangle$                                                                                         |
| KD2      | <b>40.9%</b> $ \pm 13/2\rangle$ + 29.8% $ \pm 9/2\rangle$ + 8.6 % $ \pm 15/2\rangle$ + 7.2 % $ \pm 5/2\rangle$                                                               |
| KD3      | <b>25.0%</b> $ \pm 15/2\rangle$ + 20.5 % $ \pm 7/2\rangle$ + 12.4% $ \pm 3/2\rangle$ + 11.9 % $ \pm 5/2\rangle$ + 10.7 % $ \pm 1/2\rangle$ + <b>8.8 %</b> $ \pm 11/2\rangle$ |
| KD4      | <b>31.9%</b> $ \pm 13/2\rangle$ + 19.2% $ \pm 7/2\rangle$ + 13.7 % $ \pm 5/2\rangle$ + 13.1 % $ \pm 11/2\rangle$ + 6.7 % $ \pm 9/2\rangle$                                   |
| KD5      | <b>30.0%</b> $ \pm 1/2\rangle$ + 16.5 % $ \pm 11/2\rangle$ + 15.7% $ \pm 5/2\rangle$ + 15.0% $ \pm 9/2\rangle$                                                               |
| KD6      | <b>41.5 %</b> $ \pm 3/2\rangle$ + 32.3 % $ \pm 1/2\rangle$ + 12.2 % $ \pm 5/2\rangle$ + 8.4 % $ \pm 9/2\rangle$                                                              |
| KD7      | <b>28.6 %</b> $ \pm 7/2\rangle$ + 22.5 % + $ \pm 11/2\rangle$ + 19.5% $ \pm 9/2\rangle$ + 15.6 % + $ \pm 11/2\rangle$ + 10.0 % + $ \pm 1/2\rangle$                           |
| KD8      | <b>27.0%</b> $ \pm 5/2\rangle$ + 18.7% $ \pm 7/2\rangle$ + 18.6 % $ \pm 3/2\rangle$ + 17.7% $ \pm 9/2\rangle$ + 8.5 % $ \pm 11/2\rangle$                                     |

**Table S27.** SINGLE\_ANISO computed wave function decomposition analysis for Dy1 centre in complex 4. The major dominating values are kept in bold.

| $\pm mJ$ | <i>wave function decomposition analysis Dy1</i>                                                                                                                    |
|----------|--------------------------------------------------------------------------------------------------------------------------------------------------------------------|
| KD1      | <b>82.8%</b> $ \pm 15/2\rangle + 8.5%$ $ \pm 11/2\rangle + 4.2%$ $ \pm 13/2\rangle$                                                                                |
| KD2      | <b>45.9%</b> $ \pm 13/2\rangle + 24.1%$ $ \pm 11/2\rangle + 11.6%$ $ \pm 15/2\rangle + 8.6%$ $ \pm 9/2\rangle + 6.0%$ $ \pm 7/2\rangle$                            |
| KD3      | <b>28.8%</b> $ \pm 13/2\rangle + 16.9%$ $ \pm 1/2\rangle + 17.9%$ $ \pm 9/2\rangle + 13.3%$ $ \pm 3/2\rangle + 9.5%$ $ \pm 7/2\rangle$                             |
| KD4      | <b>21.1%</b> $ \pm 1/2\rangle + 18.5%$ $ \pm 3/2\rangle + 17.5%$ $ \pm 9/2\rangle + 16.5%$ $ \pm 11/2\rangle + 11.6%$ $ \pm 13/2\rangle + 10.6%$ $ \pm 5/2\rangle$ |
| KD5      | <b>29.7%</b> $ \pm 7/2\rangle + 24.3%$ $ \pm 5/2\rangle + 19.4%$ $ \pm 1/2\rangle + 16.8%$ $ \pm 3/2\rangle$                                                       |
| KD6      | <b>24.2%</b> $ \pm 11/2\rangle + 19.3%$ $ \pm 7/2\rangle + 19.0%$ $ \pm 5/2\rangle + 16.4%$ $ \pm 3/2\rangle + 10.5%$ $ \pm 1/2\rangle$                            |
| KD7      | <b>24.4%</b> $ \pm 5/2\rangle + 18.7%$ $ \pm 3/2\rangle + 16.7%$ $ \pm 9/2\rangle + 14.7%$ $ \pm 1/2\rangle + 13.9%$ $ \pm 7/2\rangle + 8.5%$ $ \pm 11/2\rangle$   |
| KD8      | <b>26.4%</b> $ \pm 9/2\rangle + 18.2%$ $ \pm 7/2\rangle + 16.9%$ $ \pm 1/2\rangle + 15.3%$ $ \pm 3/2\rangle + 11.2%$ $ \pm 5/2\rangle + 10.1%$ $ \pm 11/2\rangle$  |

**Table S28.** SINGLE\_ANISO computed wave function decomposition analysis for Dy2 centre, in complex 4. The major dominating values are kept in bold.

| $\pm mJ$ | <i>wave function decomposition analysis Dy2</i>                                                                                                                    |
|----------|--------------------------------------------------------------------------------------------------------------------------------------------------------------------|
| KD1      | <b>82.8%</b> $ \pm 15/2\rangle + 8.5%$ $ \pm 11/2\rangle + 4.2%$ $ \pm 13/2\rangle$                                                                                |
| KD2      | <b>45.9%</b> $ \pm 13/2\rangle + 24.1%$ $ \pm 11/2\rangle + 11.6%$ $ \pm 15/2\rangle + 8.6%$ $ \pm 9/2\rangle + 6.0%$ $ \pm 7/2\rangle$                            |
| KD3      | <b>28.8%</b> $ \pm 13/2\rangle + 16.9%$ $ \pm 1/2\rangle + 17.9%$ $ \pm 9/2\rangle + 13.3%$ $ \pm 3/2\rangle + 9.5%$ $ \pm 7/2\rangle + 7.7%$ $ \pm 5/2\rangle$    |
| KD4      | <b>21.1%</b> $ \pm 1/2\rangle + 18.6%$ $ \pm 3/2\rangle + 17.6%$ $ \pm 9/2\rangle + 16.5%$ $ \pm 11/2\rangle + 11.6%$ $ \pm 13/2\rangle + 10.5%$ $ \pm 5/2\rangle$ |
| KD5      | <b>29.8%</b> $ \pm 7/2\rangle + 24.3%$ $ \pm 5/2\rangle + 19.4%$ $ \pm 1/2\rangle + 16.7%$ $ \pm 3/2\rangle$                                                       |
| KD6      | <b>24.2%</b> $ \pm 11/2\rangle + 19.3%$ $ \pm 7/2\rangle + 19.0%$ $ \pm 5/2\rangle + 16.5%$ $ \pm 3/2\rangle + 10.4%$ $ \pm 1/2\rangle$                            |
| KD7      | <b>24.4%</b> $ \pm 5/2\rangle + 18.7%$ $ \pm 3/2\rangle + 16.6%$ $ \pm 9/2\rangle + 14.7%$ $ \pm 1/2\rangle + 14.0%$ $ \pm 7/2\rangle + 8.5%$ $ \pm 11/2\rangle$   |
| KD8      | <b>26.4%</b> $ \pm 9/2\rangle + 18.2%$ $ \pm 7/2\rangle + 16.9%$ $ \pm 1/2\rangle + 15.3%$ $ \pm 3/2\rangle + 11.2%$ $ \pm 5/2\rangle + 10.2%$ $ \pm 11/2\rangle$  |

## POLY\_ANISO Simulation Results

**Table S29.** Exchange and dipolar interaction obtained from the best fit using Lines model for complex 4.

| <b>4</b> | $J_{total}$ | $J_{ex}$ | $J_{dipo}$ | $zJ$   |
|----------|-------------|----------|------------|--------|
| (Dy)     | -0.01       | 0.009    | -0.019     | -0.002 |

**Table S30.** The energy of the low-lying non-Kramer's exchange doublets along with  $g_{zz}$  and tunnelling gap obtained from POLY\_ANISO simulation of complex 4.

| <b>Exchange doublets</b> | <b>Energy/cm<sup>-1</sup></b> | <b><math>g_{zz}</math></b> | <b><math>\Delta_{tunnel}</math></b> |
|--------------------------|-------------------------------|----------------------------|-------------------------------------|
| 1                        | 0.000                         | 0.0062                     | 1.4E-05                             |
| 2                        | 0.164                         | 37.911                     | 1.4E-05                             |
| 3                        | 19.162                        | 9.788                      | 1.4E-04                             |
| 4                        | 19.181                        | 9.789                      | 1.1E-04                             |
| 5                        | 19.298                        | 36.225                     | 1.2E-04                             |
| 6                        | 19.317                        | 36.224                     | 1.5E-04                             |
| 7                        | 38.313                        | 0.0061                     | 1.4E-05                             |
| 8                        | 38.481                        | 38.216                     | 1.4E-05                             |

**Table S31.** Basis functions used in *ab initio* CASSCF calculations using MOLCAS 8.2 code.

| <b>Atoms</b> | <b>ANO-RCC basis functions</b> |
|--------------|--------------------------------|
| H            | 2s                             |
| C            | 3s2p                           |
| N, O, F      | 3s2p                           |
| Dy           | 8s7p5d3f2g1h                   |

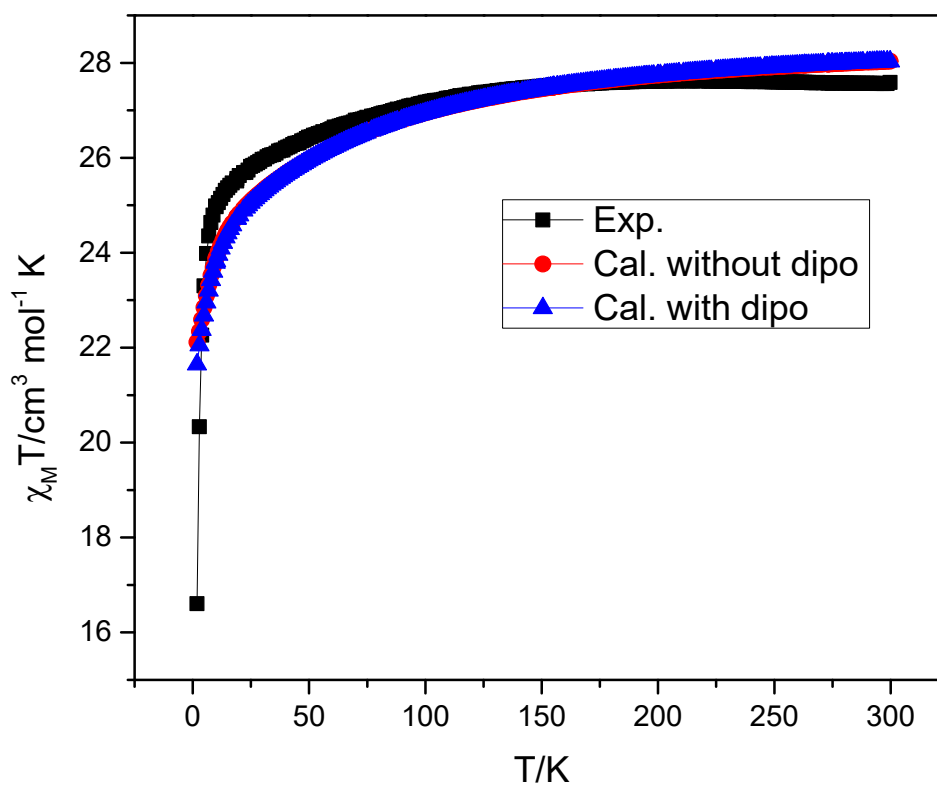

**Figure S28.** Poly\_aniso fit for complex 4.

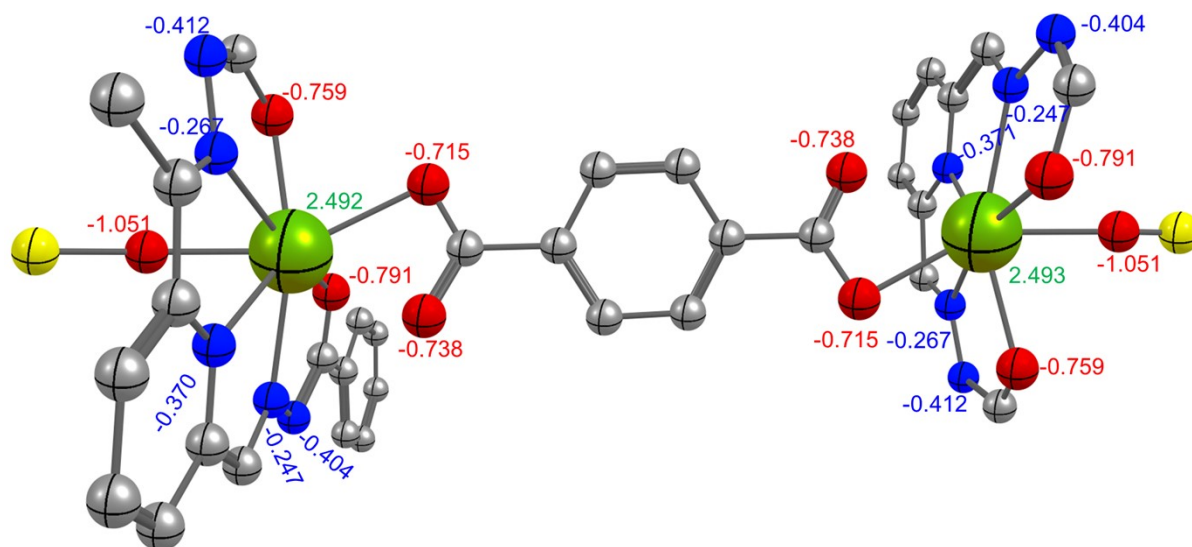

**Figure S29.** CASSCF computed LoProp charges on the first coordination sphere of complex 4. Color code: Green (Dy), red (O), blue (N), yellow (P), grey (C), and white (H).



**Table S32.** RASSI-SO computed low-lying 21 spin-free sextet states and the spin-orbit coupled (Kramer doublets) for Dy in complex **1**. All the values are reported here in cm<sup>-1</sup>.

| SPIN-FREE STATES | SPIN-ORBIT STATES |         |
|------------------|-------------------|---------|
| 0.0              | 0.0               | 9771.0  |
| 13.6             | 77.3              | 9800.8  |
| 92.4             | 127.4             | 9866.4  |
| 117.9            | 204.2             | 9974.6  |
| 212.1            | 263.7             | 11065.0 |
| 232.6            | 347.9             | 11176.0 |
| 320.9            | 391.2             | 11302.2 |
| 447.7            | 522.2             | 11802.7 |
| 537.4            | 3060.6            | 11863.9 |
| 642.6            | 3160.4            | 11885.0 |
| 702.8            | 3176.4            | 11909.0 |
| 7498.4           | 3233.6            | 11930.5 |
| 7683.1           | 3268.5            | 13570.7 |
| 7709.0           | 3320.9            | 13644.5 |
| 7753.3           | 3407.8            | 13697.0 |
| 7800.1           | 5671.9            | 13715.1 |
| 7828.9           | 5728.9            | 15006.5 |
| 7884.1           | 5760.1            | 15047.9 |
| 34718.3          | 5861.2            | 15082.5 |
| 34875.5          | 5906.2            | 16036.5 |
| 35159.3          | 5971.5            | 16050.5 |
|                  | 7881.3            | 16639.5 |
|                  | 7911.7            | 38716.6 |
|                  | 7979.0            | 38797.9 |
|                  | 8076.6            | 38858.2 |
|                  | 8149.2            | 38940.2 |
|                  | 9539.0            | 40115.9 |
|                  | 9597.9            | 40220.8 |
|                  | 9622.0            | 40392.6 |
|                  | 9646.8            | 41223.6 |
|                  | 9687.7            | 41272.6 |
|                  | 9711.5            |         |

**Table S33.** RASSI-SO computed low-lying 21 spin-free sextet states and the spin-orbit coupled (Kramer doublets) for Dy in complex **2**. All the values are reported here in cm<sup>-1</sup>.

| SPIN-FREE STATES | SPIN-ORBIT STATES |         |
|------------------|-------------------|---------|
| 0.0              | 0.0               | 9800.6  |
| 10.6             | 51.5              | 9823.0  |
| 86.7             | 184.9             | 9886.0  |
| 101.4            | 223.7             | 10002.5 |
| 270.5            | 295.3             | 11055.7 |
| 281.1            | 386.2             | 11239.3 |
| 335.6            | 453.4             | 11314.8 |
| 453.3            | 519.8             | 11820.9 |
| 588.0            | 3031.5            | 11891.7 |
| 636.2            | 3191.2            | 11909.6 |
| 736.6            | 3221.6            | 11931.9 |
| 7526.7           | 3249.2            | 11951.7 |
| 7668.3           | 3308.4            | 13597.5 |
| 7727.4           | 3366.9            | 13658.6 |
| 7767.9           | 3416.7            | 13719.3 |
| 7837.1           | 5651.7            | 13742.2 |
| 7841.5           | 5783.0            | 15028.1 |
| 7904.9           | 5789.1            | 15075.4 |
| 34643.1          | 5869.4            | 15101.0 |
| 35007.0          | 5935.1            | 16061.0 |
| 35145.0          | 6004.0            | 16071.3 |
|                  | 7876.7            | 16662.3 |
|                  | 7949.2            | 38728.2 |
|                  | 8007.7            | 38780.6 |
|                  | 8088.7            | 38854.2 |
|                  | 8184.6            | 39006.5 |
|                  | 9553.0            | 40118.0 |
|                  | 9621.6            | 40280.5 |
|                  | 9641.2            | 40405.9 |
|                  | 9658.1            | 41242.3 |
|                  | 9721.3            | 41301.9 |
|                  | 9735.2            |         |

**Table S34.** RASSI-SO computed low-lying 21 spin-free sextet states and the spin-orbit coupled (Kramer doublets) for Dy in complex **3**. All the values are reported here in  $\text{cm}^{-1}$ .

| SPIN-FREE STATES | SPIN-ORBIT STATES |         |
|------------------|-------------------|---------|
| 0.0              | 0.0               | 9786.2  |
| 45.9             | 29.3              | 9843.6  |
| 55.1             | 86.3              | 9876.8  |
| 104.2            | 249.8             | 10035.5 |
| 208.7            | 340.0             | 11048.7 |
| 220.2            | 405.9             | 11220.7 |
| 460.6            | 467.2             | 11352.9 |
| 555.2            | 545.7             | 11833.6 |
| 596.1            | 3059.1            | 11897.5 |
| 693.8            | 3107.4            | 11916.4 |
| 736.8            | 3181.5            | 11946.3 |
| 7505.2           | 3285.6            | 11954.6 |
| 7748.6           | 3327.5            | 13596.5 |
| 7764.3           | 3382.3            | 13676.3 |
| 7766.6           | 3457.6            | 13730.9 |
| 7837.5           | 5686.0            | 13746.2 |
| 7867.4           | 5727.5            | 15034.3 |
| 7925.1           | 5758.3            | 15080.7 |
| 34734.6          | 5903.5            | 15114.0 |
| 34830.7          | 5934.5            | 16066.7 |
| 35307.1          | 6039.7            | 16083.1 |
|                  | 7903.8            | 16671.4 |
|                  | 7934.8            | 38698.2 |
|                  | 7963.3            | 38812.9 |
|                  | 8106.1            | 38904.2 |
|                  | 8215.3            | 38979.9 |
|                  | 9533.1            | 40107.0 |
|                  | 9631.0            | 40231.9 |
|                  | 9657.2            | 40502.3 |
|                  | 9678.3            | 41266.3 |
|                  | 9713.1            | 41329.7 |
|                  | 9739.2            |         |

**Table S35.** RASSI-SO computed low-lying 21 spin-free sextet states and the spin-orbit coupled (Kramer doublets) for Dy@1 in complex 4. All the values are reported here in cm<sup>-1</sup>.

| <b>4(Dy1)</b>           |                          |         |
|-------------------------|--------------------------|---------|
| <b>SPIN-FREE STATES</b> | <b>SPIN-ORBIT STATES</b> |         |
| 0.0                     | 0.0                      | 9821.5  |
| 16.7                    | 19.2                     | 9869.9  |
| 53.9                    | 167.1                    | 9993.5  |
| 58.7                    | 213.5                    | 11036.5 |
| 250.9                   | 289.1                    | 11228.1 |
| 266.5                   | 363.1                    | 11323.6 |
| 324.5                   | 443.4                    | 11808.2 |
| 419.0                   | 529.9                    | 11881.8 |
| 558.3                   | 3009.3                   | 11900.7 |
| 644.0                   | 3156.2                   | 11920.3 |
| 729.0                   | 3222.2                   | 11938.2 |
| 7519.9                  | 3247.4                   | 13590.7 |
| 7652.5                  | 3301.4                   | 13647.1 |
| 7702.9                  | 3358.3                   | 13708.3 |
| 7749.5                  | 3414.0                   | 13731.6 |
| 7811.5                  | 5633.0                   | 15018.4 |
| 7832.7                  | 5757.2                   | 15070.0 |
| 7895.0                  | 5798.9                   | 15088.1 |
| 34606.6                 | 5853.8                   | 16051.5 |
| 35012.3                 | 5929.6                   | 16062.7 |
| 35142.0                 | 5998.3                   | 16654.0 |
|                         | 7860.5                   | 38712.0 |
|                         | 7938.9                   | 38763.8 |
|                         | 8002.9                   | 38843.8 |
|                         | 8078.2                   | 39013.3 |
|                         | 8179.4                   | 40104.7 |
|                         | 9543.9                   | 40280.9 |
|                         | 9610.7                   | 40409.4 |
|                         | 9630.4                   | 41237.9 |
|                         | 9650.1                   | 41302.1 |
|                         | 9708.5                   |         |
|                         | 9727.1                   |         |
|                         | 9785.1                   |         |

**Table S36.** RASSI-SO computed low-lying 21 spin-free sextet states and the spin-orbit coupled (Kramer doublets) for Dy@2 in complex 4. All the values are reported here in cm<sup>-1</sup>.

| <b>4(Dy2)</b>           |                          |         |
|-------------------------|--------------------------|---------|
| <b>SPIN-FREE STATES</b> | <b>SPIN-ORBIT STATES</b> |         |
| 0.0                     | 0.0                      | 9821.5  |
| 16.7                    | 19.2                     | 9869.8  |
| 53.8                    | 167.1                    | 9993.4  |
| 58.6                    | 213.5                    | 11036.5 |
| 250.9                   | 289.1                    | 11228.1 |
| 266.4                   | 363.1                    | 11323.5 |
| 324.5                   | 443.4                    | 11808.2 |
| 419.1                   | 529.8                    | 11881.8 |
| 558.3                   | 3009.2                   | 11900.7 |
| 643.9                   | 3156.1                   | 11920.3 |
| 729.0                   | 3222.1                   | 11938.1 |
| 7519.9                  | 3247.3                   | 13590.7 |
| 7652.5                  | 3301.3                   | 13647.0 |
| 7702.8                  | 3358.3                   | 13708.3 |
| 7749.4                  | 3413.9                   | 13731.5 |
| 7811.5                  | 5632.9                   | 15018.3 |
| 7832.7                  | 5757.2                   | 15070.0 |
| 7894.9                  | 5798.9                   | 15088.1 |
| 34606.5                 | 5853.7                   | 16051.4 |
| 35012.3                 | 5929.6                   | 16062.7 |
| 35142.0                 | 5998.2                   | 16653.9 |
|                         | 7860.4                   | 38712.0 |
|                         | 7938.9                   | 38763.8 |
|                         | 8002.9                   | 38843.8 |
|                         | 8078.2                   | 39013.2 |
|                         | 8179.4                   | 40104.6 |
|                         | 9543.8                   | 40280.8 |
|                         | 9610.7                   | 40409.4 |
|                         | 9630.3                   | 41237.8 |
|                         | 9650.0                   | 41302.1 |
|                         | 9708.5                   |         |
|                         | 9727.1                   |         |
|                         | 9785.1                   |         |

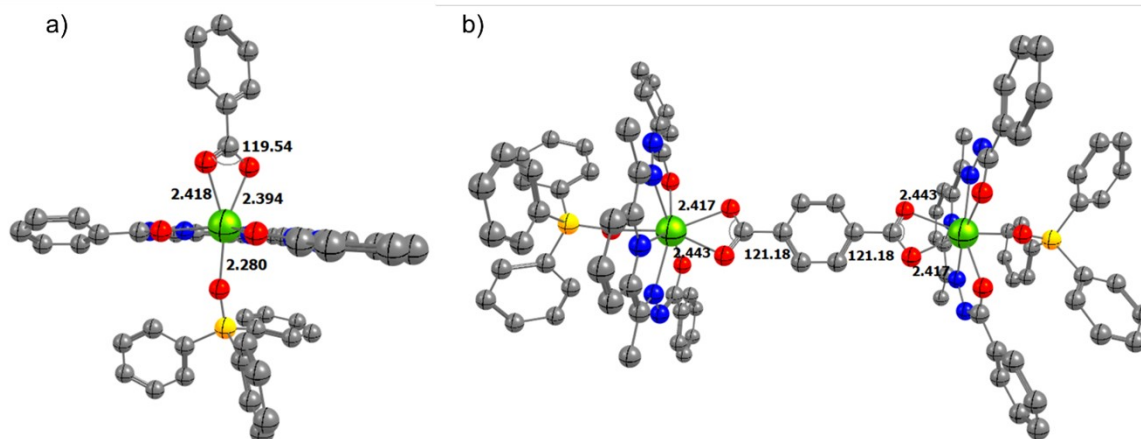

**Figure S30.** Comparison of the bite/cone angle and DyO1/DyO2 bond distances in complex a) 1 and b) 4.

**Table S37.** Hydrogen optimized cartesian coordinates of complexes 1, 2, 3, 4.

| Complex 1 |                 |                 |                 |
|-----------|-----------------|-----------------|-----------------|
| Dy        | 0.000000000000  | 0.000000000000  | 0.000000000000  |
| P         | 0.000000000000  | 0.000000000000  | 3.742071000000  |
| O         | -2.290729000000 | -0.181355000000 | 0.112150000000  |
| O         | 0.250207000000  | 2.277665000000  | 0.115401000000  |
| O         | -0.235482000000 | 0.048862000000  | 2.266918000000  |
| O         | -0.837481000000 | 0.532953000000  | -2.204969000000 |
| O         | 1.110808000000  | -0.419784000000 | -2.079100000000 |
| N         | -2.250467000000 | -2.496074000000 | 0.283732000000  |
| N         | -0.872458000000 | -2.303301000000 | 0.294329000000  |
| N         | 1.679398000000  | -1.767236000000 | 0.511484000000  |
| N         | 2.296628000000  | 0.803140000000  | 0.469078000000  |
| N         | 2.532691000000  | 2.165484000000  | 0.475999000000  |
| C         | -2.860931000000 | -1.323222000000 | 0.203956000000  |
| C         | -0.124545000000 | -3.342519000000 | 0.483648000000  |
| C         | 1.323408000000  | -3.064627000000 | 0.569278000000  |
| C         | 2.279165000000  | -4.080598000000 | 0.718295000000  |
| C         | 3.604300000000  | -3.742511000000 | 0.802982000000  |
| C         | 3.966471000000  | -2.416323000000 | 0.755666000000  |
| C         | 2.984992000000  | -1.433679000000 | 0.620613000000  |
| C         | 3.303844000000  | -0.001155000000 | 0.584400000000  |
| C         | 1.400459000000  | 2.817076000000  | 0.289565000000  |
| C         | -0.645053000000 | -4.738084000000 | 0.619804000000  |
| C         | 4.723729000000  | 0.463606000000  | 0.702772000000  |
| C         | -4.345715000000 | -1.343904000000 | 0.240149000000  |
| C         | -4.964420000000 | -2.538691000000 | 0.669712000000  |
| C         | -6.351243000000 | -2.613332000000 | 0.620527000000  |
| C         | -7.044466000000 | -1.577801000000 | 0.040684000000  |

|   |                 |                 |                 |
|---|-----------------|-----------------|-----------------|
| C | -6.460533000000 | -0.408566000000 | -0.413113000000 |
| C | -5.075327000000 | -0.365445000000 | -0.406228000000 |
| C | 1.482824000000  | 4.302548000000  | 0.270872000000  |
| C | 0.329360000000  | 5.053834000000  | 0.146584000000  |
| C | 0.370131000000  | 6.445111000000  | 0.107370000000  |
| C | 1.576171000000  | 7.096063000000  | 0.174412000000  |
| C | 2.733316000000  | 6.358422000000  | 0.311303000000  |
| C | 2.702970000000  | 4.977218000000  | 0.365215000000  |
| C | -1.333699000000 | -0.884121000000 | 4.560445000000  |
| C | -1.257915000000 | -1.232183000000 | 5.895452000000  |
| C | -2.346735000000 | -1.810411000000 | 6.525345000000  |
| C | -3.494484000000 | -2.055713000000 | 5.814520000000  |
| C | -3.572829000000 | -1.737978000000 | 4.481497000000  |
| C | -2.495189000000 | -1.138425000000 | 3.847930000000  |
| C | -0.001895000000 | 1.663433000000  | 4.411262000000  |
| C | 0.178755000000  | 1.946600000000  | 5.761126000000  |
| C | 0.044465000000  | 3.248075000000  | 6.213684000000  |
| C | -0.270937000000 | 4.260791000000  | 5.331927000000  |
| C | -0.420139000000 | 3.999078000000  | 3.992457000000  |
| C | -0.287202000000 | 2.699404000000  | 3.526137000000  |
| C | 1.547419000000  | -0.812276000000 | 4.139681000000  |
| C | 2.703904000000  | -0.077726000000 | 4.377177000000  |
| C | 3.921514000000  | -0.725739000000 | 4.493498000000  |
| C | 3.990518000000  | -2.103964000000 | 4.373396000000  |
| C | 2.850778000000  | -2.841079000000 | 4.134680000000  |
| C | 1.632858000000  | -2.199610000000 | 4.017616000000  |
| C | 0.155379000000  | 0.000000000000  | -2.772165000000 |
| C | 0.157532000000  | -0.152699000000 | -4.246038000000 |
| C | 1.261571000000  | -0.702157000000 | -4.883574000000 |
| C | 1.247631000000  | -0.870344000000 | -6.253911000000 |
| C | 0.133796000000  | -0.537833000000 | -6.977890000000 |
| C | -0.964994000000 | 0.009315000000  | -6.360560000000 |
| C | -0.948878000000 | 0.215797000000  | -4.991422000000 |
| H | 1.958199000000  | -5.131485000000 | 0.756515000000  |
| H | 4.374489000000  | -4.523685000000 | 0.909127000000  |
| H | 5.023479000000  | -2.124355000000 | 0.830639000000  |
| H | -1.748372000000 | -4.723778000000 | 0.515028000000  |
| H | -0.383911000000 | -5.181097000000 | 1.610506000000  |
| H | -0.218354000000 | -5.408289000000 | -0.163161000000 |
| H | 4.744732000000  | 1.571362000000  | 0.679218000000  |
| H | 5.350279000000  | 0.075121000000  | -0.134247000000 |
| H | 5.185311000000  | 0.112505000000  | 1.655949000000  |
| H | -4.338917000000 | -3.344009000000 | 1.080587000000  |
| H | -6.883239000000 | -3.512865000000 | 0.971303000000  |
| H | -8.146662000000 | -1.661056000000 | -0.013924000000 |
| H | -7.062078000000 | 0.393886000000  | -0.866804000000 |
| H | -4.522590000000 | 0.497918000000  | -0.815248000000 |
| H | -0.629037000000 | 4.514862000000  | 0.064143000000  |
| H | -0.569801000000 | 7.012152000000  | 0.001929000000  |
| H | 1.623068000000  | 8.196995000000  | 0.127448000000  |

|   |                 |                 |                 |
|---|-----------------|-----------------|-----------------|
| H | 3.705950000000  | 6.876456000000  | 0.372840000000  |
| H | 3.627938000000  | 4.389866000000  | 0.468153000000  |
| H | -0.327714000000 | -1.061901000000 | 6.465695000000  |
| H | -2.281821000000 | -2.078370000000 | 7.592530000000  |
| H | -4.359970000000 | -2.518974000000 | 6.317600000000  |
| H | -4.488541000000 | -1.943614000000 | 3.903811000000  |
| H | -2.549875000000 | -0.853354000000 | 2.783665000000  |
| H | 0.422382000000  | 1.144028000000  | 6.477968000000  |
| H | 0.182081000000  | 3.468575000000  | 7.284981000000  |
| H | -0.386490000000 | 5.291622000000  | 5.706857000000  |
| H | -0.642147000000 | 4.807675000000  | 3.277954000000  |
| H | -0.411882000000 | 2.475162000000  | 2.451354000000  |
| H | 2.651420000000  | 1.021861000000  | 4.451976000000  |
| H | 4.836029000000  | -0.139582000000 | 4.679296000000  |
| H | 4.965292000000  | -2.611484000000 | 4.462543000000  |
| H | 2.904889000000  | -3.935748000000 | 4.027395000000  |
| H | 0.719183000000  | -2.783869000000 | 3.809698000000  |
| H | 2.132988000000  | -0.987364000000 | -4.272364000000 |
| H | 2.129006000000  | -1.297212000000 | -6.762232000000 |
| H | 0.123338000000  | -0.698484000000 | -8.069998000000 |
| H | -1.855616000000 | 0.285919000000  | -6.948951000000 |
| H | -1.811116000000 | 0.654398000000  | -4.463503000000 |

## Complex 2

|    |                 |                 |                 |
|----|-----------------|-----------------|-----------------|
| Dy | 0.000000000000  | 0.000000000000  | 0.000000000000  |
| P  | 0.000000000000  | 0.000000000000  | 3.748893000000  |
| O  | -2.319612000000 | -0.181249000000 | 0.113395000000  |
| O  | -0.263025000000 | -0.191613000000 | 2.284209000000  |
| O  | 0.615840000000  | -2.203158000000 | 0.029668000000  |
| O  | 1.248505000000  | 0.439950000000  | -2.024331000000 |
| O  | -0.777841000000 | -0.305508000000 | -2.239573000000 |
| N  | -2.637082000000 | 2.096263000000  | -0.134596000000 |
| N  | -1.236909000000 | 2.111025000000  | 0.072516000000  |
| N  | 1.330386000000  | 2.006202000000  | 0.517190000000  |
| N  | 2.346174000000  | -0.410079000000 | 0.633207000000  |
| N  | 2.795775000000  | -1.723569000000 | 0.707559000000  |
| C  | -3.036096000000 | 0.890031000000  | -0.078779000000 |
| C  | -0.677164000000 | 3.270135000000  | 0.149646000000  |
| C  | 0.779807000000  | 3.252939000000  | 0.430208000000  |
| C  | 1.540713000000  | 4.409789000000  | 0.599197000000  |
| C  | 2.865880000000  | 4.285094000000  | 0.870268000000  |
| C  | 3.395401000000  | 2.999926000000  | 0.991606000000  |
| C  | 2.641496000000  | 1.908266000000  | 0.798651000000  |
| C  | 3.170104000000  | 0.556666000000  | 0.857902000000  |
| C  | 1.806500000000  | -2.556923000000 | 0.365118000000  |
| C  | 4.653451000000  | 0.268503000000  | 1.162776000000  |
| C  | -1.398072000000 | 4.596076000000  | 0.064949000000  |
| C  | -4.508484000000 | 0.660250000000  | -0.259480000000 |
| C  | -6.430531000000 | -0.770817000000 | -0.290728000000 |



|   |                 |                 |                 |
|---|-----------------|-----------------|-----------------|
| C | -5.076187000000 | -0.552989000000 | -0.145368000000 |
| C | 2.111262000000  | -4.000816000000 | 0.496345000000  |
| C | 1.206888000000  | -4.914886000000 | -0.027980000000 |
| C | 1.407370000000  | -6.269184000000 | 0.094823000000  |
| C | 2.499515000000  | -6.741104000000 | 0.818235000000  |
| C | 3.429159000000  | -5.825558000000 | 1.334348000000  |
| C | 3.213999000000  | -4.450980000000 | 1.147494000000  |
| C | 0.332230000000  | 0.000000000000  | -2.748331000000 |
| C | 0.490032000000  | -0.129712000000 | -4.254991000000 |
| C | 1.726217000000  | 0.500649000000  | -4.724578000000 |
| C | -0.778930000000 | 0.481069000000  | -4.879221000000 |
| C | 0.470052000000  | -1.641869000000 | -4.545185000000 |
| C | 0.610912000000  | -1.486137000000 | 4.497702000000  |
| C | 0.729222000000  | -2.636885000000 | 3.662787000000  |
| C | 1.264155000000  | -3.822426000000 | 4.179660000000  |
| C | 1.567621000000  | -3.900185000000 | 5.546649000000  |
| C | 1.441318000000  | -2.789854000000 | 6.370595000000  |
| C | 0.971412000000  | -1.582123000000 | 5.841035000000  |
| C | 1.181124000000  | 1.277525000000  | 4.049170000000  |
| C | 2.548813000000  | 1.028327000000  | 4.282520000000  |
| C | 3.455929000000  | 1.994128000000  | 4.405089000000  |
| C | 3.023228000000  | 3.357442000000  | 4.304075000000  |
| C | 1.675095000000  | 3.578929000000  | 4.033419000000  |
| C | 0.809295000000  | 2.593533000000  | 3.922753000000  |
| C | -1.550803000000 | 0.449911000000  | 4.541810000000  |
| C | -1.738258000000 | 0.520922000000  | 5.918702000000  |
| C | -2.992936000000 | 0.797374000000  | 6.450754000000  |
| C | -4.046128000000 | 0.987288000000  | 5.620236000000  |
| C | -3.904442000000 | 0.933446000000  | 4.242628000000  |
| C | -2.663152000000 | 0.659493000000  | 3.700843000000  |
| C | -7.206126000000 | 0.292495000000  | -0.671185000000 |
| C | -5.275476000000 | 1.718529000000  | -0.817731000000 |
| C | -6.662367000000 | 1.524006000000  | -1.046114000000 |
| H | 1.065164000000  | 5.396408000000  | 0.502358000000  |
| H | 3.511471000000  | 5.165771000000  | 1.010876000000  |
| H | 4.464681000000  | 2.885838000000  | 1.223992000000  |
| H | 4.778122000000  | -0.828679000000 | 1.249737000000  |
| H | 4.978185000000  | 0.763216000000  | 2.107070000000  |
| H | 5.307433000000  | 0.642834000000  | 0.340160000000  |
| H | -2.464137000000 | 4.414364000000  | -0.176122000000 |
| H | -0.950176000000 | 5.248220000000  | -0.719818000000 |
| H | -1.338707000000 | 5.146129000000  | 1.034004000000  |
| H | -6.869334000000 | -1.762477000000 | -0.100963000000 |
| H | -4.414496000000 | -1.386348000000 | 0.152092000000  |
| H | 0.323428000000  | -4.517093000000 | -0.553368000000 |
| H | 0.684246000000  | -6.978186000000 | -0.340994000000 |
| H | 2.653879000000  | -7.824492000000 | 0.956137000000  |
| H | 4.314739000000  | -6.177608000000 | 1.887871000000  |
| H | 3.932019000000  | -3.719530000000 | 1.550148000000  |
| H | 1.748778000000  | 1.592941000000  | -4.500202000000 |

|   |                 |                 |                 |
|---|-----------------|-----------------|-----------------|
| H | 1.848051000000  | 0.383306000000  | -5.828477000000 |
| H | 2.625309000000  | 0.060598000000  | -4.235837000000 |
| H | -1.687257000000 | -0.001901000000 | -4.461185000000 |
| H | -0.770496000000 | 0.345677000000  | -5.987147000000 |
| H | -0.844961000000 | 1.575240000000  | -4.668904000000 |
| H | 1.340203000000  | -2.154770000000 | -4.070979000000 |
| H | 0.520611000000  | -1.827461000000 | -5.644676000000 |
| H | -0.460659000000 | -2.104813000000 | -4.149615000000 |
| H | 0.433743000000  | -2.558636000000 | 2.602911000000  |
| H | 1.397846000000  | -4.694069000000 | 3.520147000000  |
| H | 1.950004000000  | -4.847640000000 | 5.962429000000  |
| H | 1.709221000000  | -2.851432000000 | 7.437632000000  |
| H | 0.926115000000  | -0.695786000000 | 6.496899000000  |
| H | 2.868634000000  | -0.027580000000 | 4.354256000000  |
| H | 4.516472000000  | 1.765376000000  | 4.594448000000  |
| H | 3.735388000000  | 4.190024000000  | 4.407317000000  |
| H | 1.331092000000  | 4.621384000000  | 3.922485000000  |
| H | -0.252682000000 | 2.822848000000  | 3.714432000000  |
| H | -0.891411000000 | 0.365912000000  | 6.607446000000  |
| H | -3.118476000000 | 0.846222000000  | 7.544446000000  |
| H | -5.043859000000 | 1.194783000000  | 6.044664000000  |
| H | -4.769573000000 | 1.087457000000  | 3.578741000000  |
| H | -2.525321000000 | 0.559032000000  | 2.609452000000  |
| H | -8.297548000000 | 0.149595000000  | -0.780329000000 |
| H | -4.783970000000 | 2.677281000000  | -1.039946000000 |
| H | -7.292969000000 | 2.330625000000  | -1.451499000000 |

### Complex 3

|    |                 |                 |                 |
|----|-----------------|-----------------|-----------------|
| Dy | 0.000000000000  | 0.000000000000  | 0.000000000000  |
| P  | 0.000000000000  | 0.000000000000  | 3.776797000000  |
| F  | -0.675504000000 | -0.508935000000 | -4.887834000000 |
| F  | 0.621380000000  | 1.195732000000  | -4.836003000000 |
| F  | 1.431185000000  | -0.772633000000 | -4.696912000000 |
| O  | 2.150317000000  | 0.718562000000  | 0.199320000000  |
| O  | -0.074971000000 | -0.018781000000 | 2.280174000000  |
| O  | -1.158220000000 | 1.979299000000  | 0.176171000000  |
| O  | 0.128525000000  | -1.072901000000 | -2.210441000000 |
| O  | 0.371377000000  | 1.118539000000  | -2.218410000000 |
| N  | 2.938690000000  | -1.367868000000 | 0.842304000000  |
| N  | 1.636622000000  | -1.760128000000 | 0.556182000000  |
| N  | -0.916991000000 | -2.302904000000 | 0.245254000000  |
| N  | -2.447612000000 | -0.199696000000 | -0.073980000000 |
| N  | -3.212744000000 | 0.953803000000  | -0.167506000000 |
| C  | 3.066600000000  | -0.068674000000 | 0.635383000000  |
| C  | 1.336946000000  | -3.010457000000 | 0.686130000000  |
| C  | -0.077734000000 | -3.343512000000 | 0.435340000000  |
| C  | -0.554734000000 | -4.663598000000 | 0.435951000000  |
| C  | -1.899604000000 | -4.888388000000 | 0.261995000000  |
| C  | -2.762355000000 | -3.818460000000 | 0.103741000000  |

|   |                 |                 |                 |
|---|-----------------|-----------------|-----------------|
| C | -2.230467000000 | -2.530889000000 | 0.083808000000  |
| C | -3.083616000000 | -1.332762000000 | -0.072445000000 |
| C | -2.423861000000 | 2.014000000000  | -0.031747000000 |
| C | -4.563458000000 | -1.447816000000 | -0.186346000000 |
| C | 2.292106000000  | -4.078315000000 | 1.117794000000  |
| C | 4.399175000000  | 0.524961000000  | 0.931235000000  |
| C | 5.443545000000  | -0.234898000000 | 1.442476000000  |
| C | 6.651173000000  | 0.370068000000  | 1.755682000000  |
| C | 6.847827000000  | 1.718873000000  | 1.541796000000  |
| C | 5.825592000000  | 2.460939000000  | 1.029291000000  |
| C | 4.606830000000  | 1.875503000000  | 0.728423000000  |
| C | -3.093557000000 | 3.342052000000  | -0.141968000000 |
| C | -4.462531000000 | 3.442186000000  | -0.377560000000 |
| C | -5.051988000000 | 4.689910000000  | -0.499357000000 |
| C | -4.306269000000 | 5.842296000000  | -0.379423000000 |
| C | -2.949657000000 | 5.743265000000  | -0.140128000000 |
| C | -2.342163000000 | 4.503493000000  | -0.028173000000 |
| C | 0.296009000000  | 0.000000000000  | -2.772696000000 |
| C | 0.407997000000  | -0.018307000000 | -4.311222000000 |
| C | -1.562949000000 | 0.578987000000  | 4.452138000000  |
| C | -2.459811000000 | 1.210778000000  | 3.604916000000  |
| C | -3.686186000000 | 1.644972000000  | 4.088651000000  |
| C | -4.023212000000 | 1.441797000000  | 5.406656000000  |
| C | -3.150668000000 | 0.806375000000  | 6.247815000000  |
| C | -1.901798000000 | 0.369174000000  | 5.788675000000  |
| C | -0.336656000000 | -2.741599000000 | 3.826619000000  |
| C | -0.159246000000 | -4.019950000000 | 4.332683000000  |
| C | 0.605719000000  | -4.229922000000 | 5.449244000000  |
| C | 1.223895000000  | -3.151966000000 | 6.059189000000  |
| C | 1.072894000000  | -1.874767000000 | 5.562532000000  |
| C | 0.279413000000  | -1.648351000000 | 4.440786000000  |
| C | 1.333188000000  | 1.037671000000  | 4.388675000000  |
| C | 1.097026000000  | 2.178500000000  | 5.168964000000  |
| C | 2.173404000000  | 2.958354000000  | 5.580711000000  |
| C | 3.462721000000  | 2.624758000000  | 5.222365000000  |
| C | 3.698472000000  | 1.503985000000  | 4.424973000000  |
| C | 2.642248000000  | 0.717263000000  | 4.011753000000  |
| H | 0.144526000000  | -5.500889000000 | 0.570422000000  |
| H | -2.292399000000 | -5.918216000000 | 0.256747000000  |
| H | -3.842480000000 | -3.977478000000 | -0.020030000000 |
| H | -5.013307000000 | -1.891559000000 | 0.733990000000  |
| H | -4.855905000000 | -2.100404000000 | -1.042032000000 |
| H | -4.997481000000 | -0.440059000000 | -0.340067000000 |
| H | 2.437822000000  | -4.844083000000 | 0.319921000000  |
| H | 1.916780000000  | -4.604589000000 | 2.026485000000  |
| H | 3.275475000000  | -3.620630000000 | 1.345545000000  |
| H | 5.292269000000  | -1.313606000000 | 1.603090000000  |
| H | 7.469793000000  | -0.245678000000 | 2.166179000000  |
| H | 7.817793000000  | 2.183924000000  | 1.783976000000  |
| H | 5.958688000000  | 3.540832000000  | 0.847870000000  |

|   |                 |                 |                 |
|---|-----------------|-----------------|-----------------|
| H | 3.773833000000  | 2.472017000000  | 0.323429000000  |
| H | -5.055327000000 | 2.520454000000  | -0.477633000000 |
| H | -6.135782000000 | 4.756153000000  | -0.696426000000 |
| H | -4.785267000000 | 6.830460000000  | -0.477791000000 |
| H | -2.337539000000 | 6.656262000000  | -0.048360000000 |
| H | -1.258174000000 | 4.408783000000  | 0.143967000000  |
| H | -2.185047000000 | 1.367677000000  | 2.548359000000  |
| H | -4.383218000000 | 2.148576000000  | 3.399544000000  |
| H | -5.000979000000 | 1.784183000000  | 5.783977000000  |
| H | -3.421761000000 | 0.633269000000  | 7.302638000000  |
| H | -1.210805000000 | -0.151183000000 | 6.473701000000  |
| H | -0.958603000000 | -2.580138000000 | 2.930046000000  |
| H | -0.650678000000 | -4.865935000000 | 3.823988000000  |
| H | 0.738386000000  | -5.245457000000 | 5.855984000000  |
| H | 1.851981000000  | -3.313196000000 | 6.950958000000  |
| H | 1.584320000000  | -1.029686000000 | 6.053678000000  |
| H | 0.067598000000  | 2.451526000000  | 5.454385000000  |
| H | 1.985258000000  | 3.853638000000  | 6.196041000000  |
| H | 4.308363000000  | 3.251056000000  | 5.549924000000  |
| H | 4.722011000000  | 1.250183000000  | 4.104817000000  |
| H | 2.833065000000  | -0.163445000000 | 3.372564000000  |

#### Complex 4

|    |                 |                 |                 |
|----|-----------------|-----------------|-----------------|
| Dy | 0.000000000000  | 0.000000000000  | 0.000000000000  |
| Dy | -6.013492000000 | -6.429318000000 | -7.180674000000 |
| P  | 2.261936000000  | 1.787656000000  | 2.377678000000  |
| P  | -8.275428000000 | -8.216974000000 | -9.558352000000 |
| O  | -1.433261000000 | 1.756552000000  | -0.314210000000 |
| O  | -0.800485000000 | -0.833009000000 | 1.996707000000  |
| O  | 1.133703000000  | 1.327604000000  | 1.510064000000  |
| O  | -0.523519000000 | -0.834193000000 | -2.235317000000 |
| O  | -1.638636000000 | -1.687634000000 | -0.556376000000 |
| O  | -5.489973000000 | -5.595125000000 | -4.945357000000 |
| O  | -4.374856000000 | -4.741684000000 | -6.624297000000 |
| O  | -4.580231000000 | -8.185870000000 | -6.866464000000 |
| O  | -5.213007000000 | -5.596309000000 | -9.177381000000 |
| O  | -7.147195000000 | -7.756922000000 | -8.690738000000 |
| N  | 0.040792000000  | 2.871691000000  | -1.733626000000 |
| N  | 0.825285000000  | 1.745923000000  | -1.532705000000 |
| N  | 2.237735000000  | -0.397148000000 | -1.009516000000 |
| N  | 1.310625000000  | -1.853880000000 | 0.971121000000  |
| N  | 0.865991000000  | -2.449229000000 | 2.137429000000  |
| N  | -6.054284000000 | -9.301009000000 | -5.447048000000 |
| N  | -6.838777000000 | -8.175241000000 | -5.647969000000 |
| N  | -8.251227000000 | -6.032170000000 | -6.171158000000 |
| N  | -7.324117000000 | -4.575438000000 | -8.151795000000 |
| N  | -6.879483000000 | -3.980089000000 | -9.318103000000 |
| C  | -1.093288000000 | 2.750798000000  | -1.065298000000 |
| C  | 1.909382000000  | 1.656374000000  | -2.220760000000 |

|   |                 |                 |                 |
|---|-----------------|-----------------|-----------------|
| C | 2.714990000000  | 0.445975000000  | -1.954032000000 |
| C | 3.912756000000  | 0.166023000000  | -2.616837000000 |
| C | 4.591991000000  | -0.994897000000 | -2.325137000000 |
| C | 4.104463000000  | -1.856914000000 | -1.359884000000 |
| C | 2.920643000000  | -1.518147000000 | -0.693488000000 |
| C | 2.390754000000  | -2.322102000000 | 0.429111000000  |
| C | -0.198903000000 | -1.795764000000 | 2.584340000000  |
| C | 3.135955000000  | -3.523862000000 | 0.922910000000  |
| C | 2.361179000000  | 2.681202000000  | -3.218198000000 |
| C | -2.043977000000 | 3.881507000000  | -1.223036000000 |
| C | -1.829069000000 | 4.879836000000  | -2.166961000000 |
| C | -2.726654000000 | 5.924882000000  | -2.292494000000 |
| C | -3.862215000000 | 5.972754000000  | -1.509876000000 |
| C | -4.101313000000 | 4.978211000000  | -0.583845000000 |
| C | -3.187059000000 | 3.936759000000  | -0.436845000000 |
| C | -0.709123000000 | -2.202974000000 | 3.926955000000  |
| C | 0.003188000000  | -3.060908000000 | 4.751603000000  |
| C | -0.449413000000 | -3.336181000000 | 6.024527000000  |
| C | -1.629943000000 | -2.782978000000 | 6.488885000000  |
| C | -2.359409000000 | -1.956179000000 | 5.666011000000  |
| C | -1.909804000000 | -1.660726000000 | 4.398453000000  |
| C | -1.413502000000 | -1.601290000000 | -1.788501000000 |
| C | -2.225267000000 | -2.441676000000 | -2.740396000000 |
| C | -2.973936000000 | -3.508404000000 | -2.236677000000 |
| C | -3.754913000000 | -4.276206000000 | -3.081252000000 |
| C | 1.881473000000  | 1.576964000000  | 4.125602000000  |
| C | 0.749648000000  | 0.853023000000  | 4.461064000000  |
| C | 0.448641000000  | 0.597149000000  | 5.798450000000  |
| C | 1.256112000000  | 1.097288000000  | 6.802155000000  |
| C | 2.332603000000  | 1.868401000000  | 6.464881000000  |
| C | 2.676513000000  | 2.089429000000  | 5.145396000000  |
| C | 3.779262000000  | 0.877221000000  | 2.054013000000  |
| C | 4.091192000000  | -0.248493000000 | 2.805086000000  |
| C | 5.236579000000  | -0.978553000000 | 2.506989000000  |
| C | 6.058643000000  | -0.608735000000 | 1.461387000000  |
| C | 5.748563000000  | 0.514116000000  | 0.699585000000  |
| C | 4.611919000000  | 1.252927000000  | 0.992322000000  |
| C | 2.626987000000  | 3.522930000000  | 2.055519000000  |
| C | 3.785418000000  | 4.146667000000  | 2.526546000000  |
| C | 4.016256000000  | 5.480866000000  | 2.256833000000  |
| C | 3.097519000000  | 6.199530000000  | 1.494640000000  |
| C | 1.959602000000  | 5.579366000000  | 1.012895000000  |
| C | 1.712968000000  | 4.242726000000  | 1.291541000000  |
| C | -4.599990000000 | -4.828028000000 | -5.392173000000 |
| C | -3.788225000000 | -3.987642000000 | -4.440278000000 |
| C | -3.039556000000 | -2.920914000000 | -4.943997000000 |
| C | -2.258579000000 | -2.153112000000 | -4.099422000000 |
| C | -4.920204000000 | -9.180116000000 | -6.115376000000 |
| C | -7.922874000000 | -8.085692000000 | -4.959914000000 |
| C | -8.728482000000 | -6.875293000000 | -5.226642000000 |

|   |                  |                  |                  |
|---|------------------|------------------|------------------|
| C | -9.926248000000  | -6.595341000000  | -4.563837000000  |
| C | -10.605483000000 | -5.434421000000  | -4.855537000000  |
| C | -10.117955000000 | -4.572404000000  | -5.820790000000  |
| C | -8.934135000000  | -4.911171000000  | -6.487186000000  |
| C | -8.404246000000  | -4.107216000000  | -7.609785000000  |
| C | -5.814589000000  | -4.633554000000  | -9.765014000000  |
| C | -9.149447000000  | -2.905456000000  | -8.103584000000  |
| C | -8.374671000000  | -9.110520000000  | -3.962476000000  |
| C | -3.969515000000  | -10.310825000000 | -5.957638000000  |
| C | -4.184423000000  | -11.309154000000 | -5.013713000000  |
| C | -3.286837000000  | -12.354200000000 | -4.888180000000  |
| C | -2.151277000000  | -12.402072000000 | -5.670798000000  |
| C | -1.912179000000  | -11.407529000000 | -6.596829000000  |
| C | -2.826433000000  | -10.366077000000 | -6.743829000000  |
| C | -5.304369000000  | -4.226344000000  | -11.107629000000 |
| C | -6.016680000000  | -3.368410000000  | -11.932277000000 |
| C | -5.564079000000  | -3.093137000000  | -13.205201000000 |
| C | -4.383549000000  | -3.646340000000  | -13.669559000000 |
| C | -3.654083000000  | -4.473139000000  | -12.846685000000 |
| C | -4.103688000000  | -4.768592000000  | -11.579127000000 |
| C | -7.894965000000  | -8.006282000000  | -11.306276000000 |
| C | -6.763140000000  | -7.282341000000  | -11.641738000000 |
| C | -6.462133000000  | -7.026467000000  | -12.979124000000 |
| C | -7.269604000000  | -7.526606000000  | -13.982829000000 |
| C | -8.346095000000  | -8.297719000000  | -13.645555000000 |
| C | -8.690005000000  | -8.518747000000  | -12.326070000000 |
| C | -9.792754000000  | -7.306539000000  | -9.234687000000  |
| C | -10.104684000000 | -6.180825000000  | -9.985760000000  |
| C | -11.250071000000 | -5.450765000000  | -9.687663000000  |
| C | -12.072135000000 | -5.820583000000  | -8.642061000000  |
| C | -11.762055000000 | -6.943434000000  | -7.880259000000  |
| C | -10.625411000000 | -7.682245000000  | -8.172996000000  |
| C | -8.640479000000  | -9.952248000000  | -9.236193000000  |
| C | -9.798910000000  | -10.575985000000 | -9.707220000000  |
| C | -10.029748000000 | -11.910184000000 | -9.437507000000  |
| C | -9.111011000000  | -12.628848000000 | -8.675314000000  |
| C | -7.973094000000  | -12.008684000000 | -8.193569000000  |
| C | -7.726460000000  | -10.672044000000 | -8.472215000000  |
| H | 4.292905000000   | 0.861523000000   | -3.377360000000  |
| H | 5.526404000000   | -1.235049000000  | -2.856013000000  |
| H | 4.638284000000   | -2.781546000000  | -1.105989000000  |
| H | 4.180231000000   | -3.262576000000  | 1.191363000000   |
| H | 3.179579000000   | -4.313964000000  | 0.143735000000   |
| H | 2.617514000000   | -3.924041000000  | 1.811701000000   |
| H | 1.659727000000   | 3.532571000000   | -3.194498000000  |
| H | 2.377472000000   | 2.256674000000   | -4.244407000000  |
| H | 3.387506000000   | 3.038732000000   | -2.992498000000  |
| H | -0.931696000000  | 4.822443000000   | -2.798372000000  |
| H | -2.541437000000  | 6.713322000000   | -3.039760000000  |
| H | -4.578400000000  | 6.801959000000   | -1.627847000000  |

|   |                  |                  |                  |
|---|------------------|------------------|------------------|
| H | -5.006721000000  | 5.003512000000   | 0.042522000000   |
| H | -3.354341000000  | 3.129654000000   | 0.292068000000   |
| H | 0.941824000000   | -3.491338000000  | 4.374389000000   |
| H | 0.134525000000   | -4.005090000000  | 6.677238000000   |
| H | -1.984005000000  | -3.010120000000  | 7.506978000000   |
| H | -3.307706000000  | -1.521601000000  | 6.021402000000   |
| H | -2.466548000000  | -0.986956000000  | 3.730449000000   |
| H | -2.932482000000  | -3.703452000000  | -1.154527000000  |
| H | -4.354473000000  | -5.119601000000  | -2.706480000000  |
| H | 0.090501000000   | 0.472644000000   | 3.664874000000   |
| H | -0.434558000000  | -0.015146000000  | 6.034732000000   |
| H | 1.017230000000   | 0.897960000000   | 7.858176000000   |
| H | 2.970354000000   | 2.296768000000   | 7.255202000000   |
| H | 3.572101000000   | 2.685970000000   | 4.914960000000   |
| H | 3.435079000000   | -0.563597000000  | 3.630863000000   |
| H | 5.480970000000   | -1.864984000000  | 3.112757000000   |
| H | 6.961252000000   | -1.196476000000  | 1.233273000000   |
| H | 6.393332000000   | 0.812939000000   | -0.140310000000  |
| H | 4.361474000000   | 2.139504000000   | 0.389153000000   |
| H | 4.533064000000   | 3.568034000000   | 3.092222000000   |
| H | 4.929902000000   | 5.968892000000   | 2.629573000000   |
| H | 3.283843000000   | 7.261187000000   | 1.269256000000   |
| H | 1.239893000000   | 6.139064000000   | 0.395903000000   |
| H | 0.818116000000   | 3.742087000000   | 0.892540000000   |
| H | -3.081010000000  | -2.725866000000  | -6.026147000000  |
| H | -1.659019000000  | -1.309717000000  | -4.474194000000  |
| H | -10.306397000000 | -7.290841000000  | -3.803314000000  |
| H | -11.539896000000 | -5.194269000000  | -4.324661000000  |
| H | -10.651776000000 | -3.647772000000  | -6.074685000000  |
| H | -10.193722000000 | -3.166742000000  | -8.372038000000  |
| H | -9.193072000000  | -2.115354000000  | -7.324409000000  |
| H | -8.631005000000  | -2.505277000000  | -8.992375000000  |
| H | -7.673219000000  | -9.961889000000  | -3.986176000000  |
| H | -8.390964000000  | -8.685992000000  | -2.936267000000  |
| H | -9.400998000000  | -9.468049000000  | -4.188176000000  |
| H | -5.081796000000  | -11.251761000000 | -4.382302000000  |
| H | -3.472055000000  | -13.142640000000 | -4.140914000000  |
| H | -1.435092000000  | -13.231277000000 | -5.552827000000  |
| H | -1.006771000000  | -11.432830000000 | -7.223196000000  |
| H | -2.659151000000  | -9.558972000000  | -7.472742000000  |
| H | -6.955316000000  | -2.937979000000  | -11.555063000000 |
| H | -6.148017000000  | -2.424228000000  | -13.857912000000 |
| H | -4.029487000000  | -3.419198000000  | -14.687652000000 |
| H | -2.705786000000  | -4.907717000000  | -13.202076000000 |
| H | -3.546944000000  | -5.442362000000  | -10.911123000000 |
| H | -6.103993000000  | -6.901962000000  | -10.845548000000 |
| H | -5.578934000000  | -6.414172000000  | -13.215406000000 |
| H | -7.030722000000  | -7.327278000000  | -15.038850000000 |
| H | -8.983846000000  | -8.726086000000  | -14.435876000000 |
| H | -9.585593000000  | -9.115288000000  | -12.095634000000 |

|   |                  |                  |                  |
|---|------------------|------------------|------------------|
| H | -9.448571000000  | -5.865721000000  | -10.811537000000 |
| H | -11.494462000000 | -4.564334000000  | -10.293431000000 |
| H | -12.974744000000 | -5.232842000000  | -8.413947000000  |
| H | -12.406824000000 | -7.242257000000  | -7.040364000000  |
| H | -10.374966000000 | -8.568822000000  | -7.569827000000  |
| H | -10.546556000000 | -9.997352000000  | -10.272896000000 |
| H | -10.943394000000 | -12.398210000000 | -9.810247000000  |
| H | -9.297335000000  | -13.690505000000 | -8.449930000000  |
| H | -7.253385000000  | -12.568382000000 | -7.576577000000  |
| H | -6.831608000000  | -10.171405000000 | -8.073214000000  |

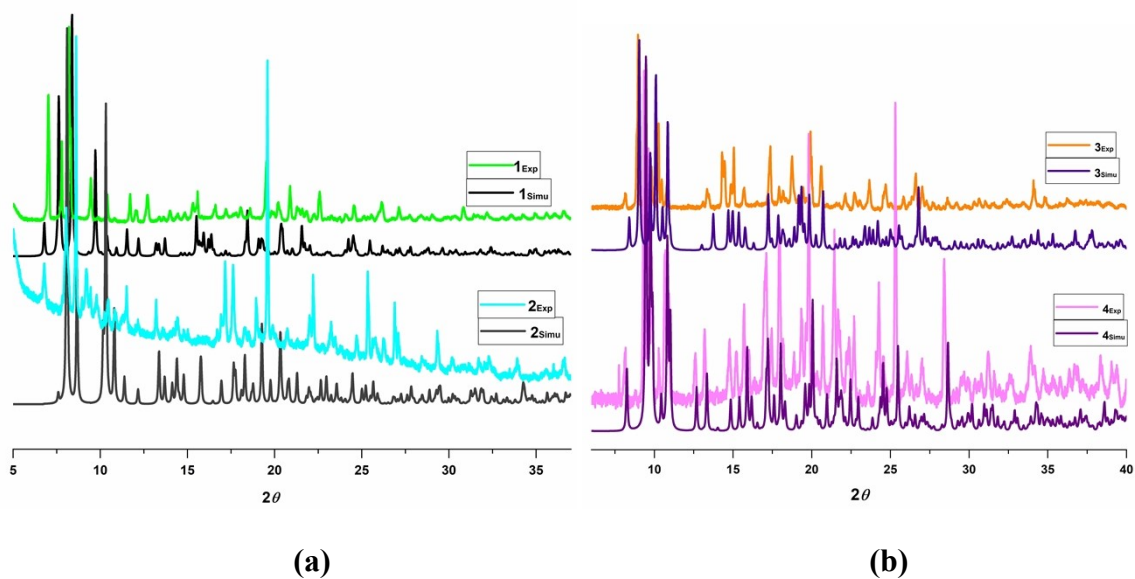

**Figure S31.** Experimental powder XRD pattern and simulated powder XRD from single crystal data of (a) complex 1-2, (b) complex 3-4.

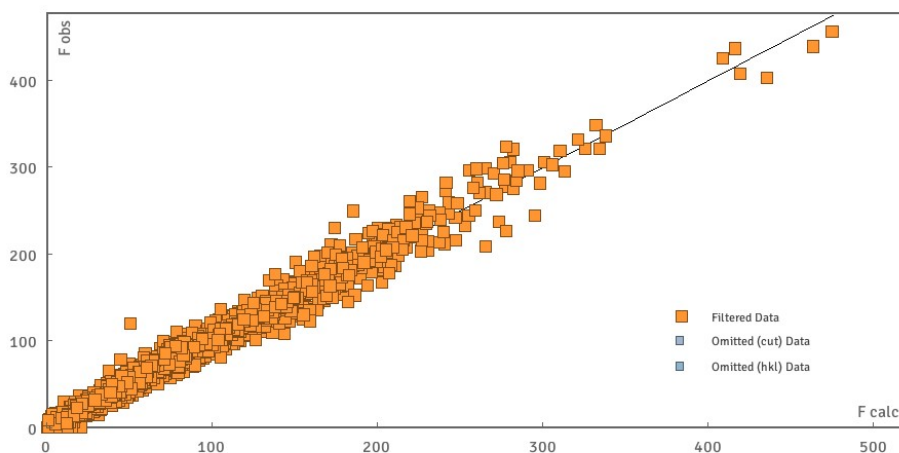

**Figure S32.**  $F_{obs}$  vs  $F_{calc}$  plot of complex 2.



## References

1. A. K. Bar, P. Kalita, J.-P. Sutter and V. Chandrasekhar, *Inorg. Chem.*, 2018, **57**, 2398-2401.
2. P. Kalita, N. Ahmed, A. K. Bar, S. Dey, A. Jana, G. Rajaraman, J.-P. Sutter and V. Chandrasekhar, *Inorg. Chem.*, 2020, **59**, 6603-6612.
3. P. Kalita, N. Ahmed, S. Moorthy, V. Béreau, A. K. Bar, P. Kumar, P. Nayak, J.-P. Sutter, S. K. Singh and V. Chandrasekhar, *Dalton Trans.*, 2023, **52**, 2804-2815.
